# Supplementary material for: Real-life use of tocilizumab with or without corticosteroid in hospitalized patients with moderate-to-severe COVID-19 pneumonia: A retrospective cohort study
Source: PLoS One. 2021 Sep 10;16(9):e0257376. doi: 10.1371/journal.pone.0257376 (PMC8432821; doi:10.1371/journal.pone.0257376)
Supplement: S1 Dataset — (CSV) [file pone.0257376.s004.csv]

dataset_RussoEtAl
code	sex	age	out_IOT	out_deathcovid	out_composito	time_composito	time_exit	cm_CVD	cm_resp	cm_cancer	cm_CKI	cm_diab	cm_autoimm	cm_dislip	cm_obes	cm_neurodeg	cm_ipotir	cm_other	cm_charlson	cm_sum	tp_antibiotic	tp_remdesivir	tp_kaletra	tp_HCQ	tp_enoxaparine	tp_tocicortisone	Sympt_conj	Sympt_fever	Sympt_cough	Sympt_diarrhoea	Sympt_dispnea	Sympt_myalgia	Sympt_TasteSmell	Sympt_timing	Lab_T0_WBC	Lab_T0_neu	Lab_T0_lymph	Lab_T0_N/L	Lab_T0_ferritin	Lab_T0_LDH	Lab_T0_d-dimer	Lab_T0_CRP	O2_P/F adm	O2_admission	O2_oxy-supply	Clin severity
1	male	72	1	1	1	6	20	1	1	0	0	0	0	0	0	0	0	0	1	2	1	0	1	1	1	4_toci_cortisone	0	1	1	0	1	0	0	7gg-	9600	4290	4760	0.901260504	NA	355	3.222	4.8	210	2_VM	1_venturi	3
2	male	86	0	0	0	78	78	1	1	0	0	0	0	0	0	0	0	1	1	3	1	0	1	1	1	2_notoci_cortisone	0	1	0	0	1	0	0	7gg-	9310	6460	1960	3.295918367	969	301	1.011	9.45	313	2_VM	1_venturi	2
3	male	48	0	0	0	16	16	0	0	1	0	0	0	0	0	0	0	0	2	1	1	0	1	1	0	3_toci_nocortisone	0	0	1	0	0	1	0	7gg-	3090	2410	540	4.462962963	NA	260	1.545	3.1	248	2_VM	1_venturi	2
4	male	78	0	0	0	32	32	0	0	0	0	1	0	1	0	0	0	0	1	2	1	0	1	1	0	3_toci_nocortisone	0	1	1	0	1	0	0	7gg-	4820	3390	840	4.035714286	NA	260	1.547	9.5	267	1_AA	1_venturi	2
5	female	67	0	0	0	13	13	0	0	0	0	0	0	0	0	0	0	0	0	0	0	0	0	1	0	2_notoci_cortisone	0	1	0	0	0	0	0	7gg-	2150	1410	480	2.9375	480	284	862	3.7	429	1_AA	0_noventilazione	2
6	male	52	0	0	0	30	30	0	0	0	0	0	0	0	0	0	0	0	0	0	1	0	1	1	1	4_toci_cortisone	0	1	1	0	0	0	0	7gg-	5050	4060	560	7.25	NA	283	NA	9.9	338	1_AA	1_venturi	3
7	female	42	1	1	1	7	44	1	0	0	0	0	1	0	0	0	0	0	1	2	1	0	1	1	1	3_toci_nocortisone	0	1	1	0	1	0	0	7gg-	10730	9800	390	25.12820513	NA	282	1.521	28.3	180	2_VM	1_venturi	3
8	female	63	0	0	0	15	15	0	0	0	0	0	1	0	0	0	0	0	1	1	0	0	1	1	0	3_toci_nocortisone	0	1	1	1	1	1	0	7gg-	3540	2580	560	4.607142857	672	370	501	1.8	352	1_AA	1_venturi	2
9	female	85	0	0	0	39	39	1	0	0	0	0	0	1	0	0	0	0	0	2	1	0	1	1	1	1_notoci_nocortisone	0	1	1	1	1	1	0	8gg+	2110	1430	380	3.763157895	334	303	1.349	6.2	581	1_AA	1_venturi	2
10	female	81	0	0	0	25	25	1	0	0	0	0	1	1	0	0	0	0	0	3	1	0	1	1	1	3_toci_nocortisone	0	1	1	1	1	1	0	7gg-	9500	7450	1090	6.834862385	1595	807	4.473	15.3	257	1_AA	1_venturi	3
11	male	69	0	0	0	14	14	0	0	0	0	0	0	0	0	0	0	0	0	0	0	0	1	1	0	3_toci_nocortisone	0	1	1	0	1	0	0	7gg-	8960	7490	800	9.3625	1055	374	788	9.5	226	2_VM	1_venturi	3
12	male	39	0	0	0	17	17	0	0	0	0	0	0	0	0	0	0	0	0	0	0	0	0	1	0	3_toci_nocortisone	0	1	1	0	1	0	0	7gg-	3360	2530	640	3.953125	NA	313	544	1.7	319	1_AA	1_venturi	3
13	male	61	0	0	0	43	43	0	0	0	0	0	1	0	0	0	0	0	1	1	0	0	1	1	0	3_toci_nocortisone	0	1	1	0	0	0	0	8gg+	5230	3680	1070	3.439252336	973	224	401	4.7	343	1_AA	1_venturi	2
14	male	83	0	0	0	35	35	1	1	0	0	0	0	0	0	0	0	0	1	2	1	0	1	1	1	3_toci_nocortisone	0	1	1	0	0	1	0	7gg-	6900	6000	530	11.32075472	901	354	1.947	20.2	336	2_VM	1_venturi	2
15	female	78	0	0	0	29	29	1	1	0	0	1	0	0	0	0	0	0	2	3	0	0	1	1	1	3_toci_nocortisone	0	0	1	0	1	1	0	7gg-	4600	3770	480	7.854166667	205	379	531	5.6	300	1_AA	1_venturi	2
16	male	52	0	0	0	19	19	0	1	0	0	0	0	0	0	0	0	0	0	1	0	0	0	1	1	4_toci_cortisone	0	1	1	0	1	0	0	7gg-	3760	2790	650	4.292307692	863	285	1.07	1.7	324	1_AA	1_venturi	3
17	male	42	0	0	0	19	19	0	0	0	0	1	0	0	0	0	0	0	1	1	0	0	1	1	0	3_toci_nocortisone	0	1	1	1	0	0	0	7gg-	4810	3630	750	4.84	747	331	507	8.9	357	1_AA	1_venturi	2
18	female	72	0	0	0	23	23	1	0	0	0	0	0	0	0	0	1	0	0	2	1	0	1	1	1	3_toci_nocortisone	0	1	1	1	1	0	0	7gg-	4310	3330	710	4.690140845	NA	311	1.695	20.8	204	3_CPAP	1_venturi	3
19	female	66	0	0	0	21	21	0	0	0	0	0	0	0	0	0	0	0	0	0	0	0	1	1	0	3_toci_nocortisone	0	1	1	0	1	0	0	7gg-	12020	10470	1080	9.694444444	761	421	618	16.4	211	2_VM	1_venturi	3
20	male	68	0	0	0	34	34	1	1	1	0	1	0	0	1	0	0	0	2	5	1	0	1	1	1	4_toci_cortisone	0	1	1	0	1	0	0	8gg+	11330	8660	2200	3.936363636	NA	375	NA	5.7	285	1_AA	1_venturi	3
21	female	63	0	0	0	20	20	0	0	0	0	0	0	0	0	0	0	1	0	1	1	0	0	1	0	3_toci_nocortisone	0	1	1	0	1	1	0	7gg-	2560	1850	480	3.854166667	65	293	1.762	1.25	304	1_AA	1_venturi	3
22	male	56	0	0	0	36	36	0	0	0	0	0	0	0	0	0	0	0	0	0	0	0	0	1	1	4_toci_cortisone	0	1	0	0	0	0	0	7gg-	4900	2820	1450	1.944827586	1171	247	536	1.1	386	1_AA	1_venturi	2
23	female	85	0	0	0	55	55	0	0	1	0	1	0	1	1	0	0	0	1	4	1	0	0	1	1	4_toci_cortisone	0	1	1	0	1	1	0	7gg-	11590	10360	700	14.8	467	450	4.473	18.3	165	2_VM	1_venturi	3
24	female	28	0	0	0	12	12	0	0	0	0	0	0	0	0	0	0	0	0	0	1	0	0	1	0	1_notoci_nocortisone	0	1	1	0	0	1	1	7gg-	3870	2160	1340	1.611940299	14	195	NA	0.1	433	1_AA	0_noventilazione	1
25	female	87	0	0	0	27	27	1	0	0	0	0	0	0	0	1	0	0	2	2	1	0	0	1	1	2_notoci_cortisone	0	1	1	0	1	0	0	8gg+	10840	9850	560	17.58928571	392	440	1.832	0.35	153	2_VM	1_venturi	3
26	male	59	0	1	1	13	13	0	0	1	0	0	0	0	0	0	0	0	2	1	1	0	0	1	1	4_toci_cortisone	0	1	0	0	1	0	0	7gg-	9530	8460	590	14.33898305	3955	395	1.44	3.72	142	2_VM	1_venturi	3
27	female	55	0	0	0	14	14	0	0	0	0	0	0	0	0	0	0	0	0	0	1	0	0	1	0	1_notoci_nocortisone	0	1	0	0	0	0	1	7gg-	2210	1120	850	1.317647059	67	200	208	0.1	519	1_AA	0_noventilazione	2
28	female	70	0	1	1	53	53	1	0	0	1	1	0	0	1	0	1	0	3	5	1	0	1	1	1	4_toci_cortisone	0	0	1	0	1	0	0	7gg-	8650	7850	420	18.69047619	612	274	1.17	0.4	146	2_VM	1_venturi	3
29	male	24	0	0	0	11	11	0	0	0	0	0	0	0	0	0	0	0	0	0	1	0	0	0	1	1_notoci_nocortisone	0	1	0	0	1	1	0	7gg-	7040	3840	2270	1.691629956	247	186	171	0.13	576	1_AA	0_noventilazione	2
30	female	65	0	0	0	48	48	1	0	0	0	0	0	0	0	0	0	0	0	1	0	0	0	1	1	2_notoci_cortisone	0	0	0	1	0	1	1	7gg-	3740	2450	880	2.784090909	562	295	0.44	1.2	467	1_AA	0_noventilazione	2
31	female	75	0	0	0	35	35	1	0	1	0	0	0	0	0	0	1	0	2	3	0	0	0	1	1	4_toci_cortisone	0	1	1	1	1	0	0	7gg-	5210	3120	1650	1.890909091	50	238	1.557	1.1	395	1_AA	0_noventilazione	2
32	female	46	0	0	0	12	12	0	0	0	0	0	0	0	0	0	0	1	0	1	1	0	0	1	1	2_notoci_cortisone	0	1	1	0	1	0	0	7gg-	7590	4240	2470	1.71659919	42	158	276	0.16	348	1_AA	1_venturi	1
33	female	78	0	0	0	31	31	0	0	0	0	0	1	0	0	0	0	0	1	1	1	0	0	1	1	4_toci_cortisone	0	1	0	0	0	0	0	7gg-	4160	2860	780	3.666666667	683	217	3.814	1.9	462	1_AA	1_venturi	2
34	female	79	0	0	0	24	24	1	1	0	0	0	0	1	0	0	1	0	1	4	1	0	0	1	1	4_toci_cortisone	0	1	1	0	0	0	0	7gg-	5230	4410	510	8.647058824	336	349	1.238	9.6	226	2_VM	1_venturi	2
35	male	73	0	1	1	10	10	0	0	1	0	1	0	0	0	0	0	1	6	3	0	0	0	1	1	4_toci_cortisone	0	1	1	0	1	0	0	7gg-	4290	3410	600	5.683333333	3792	347	1.578	29.7	194	2_VM	1_venturi	3
36	female	50	0	0	0	13	13	0	0	0	0	0	0	0	0	0	0	0	0	0	0	0	1	1	0	3_toci_nocortisone	0	1	1	0	1	1	0	8gg+	3690	2460	900	2.733333333	466	NA	1.89	9.7	329	2_VM	1_venturi	2
37	male	66	0	0	0	27	27	1	0	0	0	1	0	0	0	0	0	0	1	2	0	0	1	1	1	3_toci_nocortisone	0	1	0	0	1	0	0	8gg+	7670	6770	640	10.578125	NA	392	NA	14.7	160	2_VM	1_venturi	3
38	male	87	0	NA	1	31	31	0	1	1	0	0	0	0	0	0	0	0	3	2	1	0	0	1	1	4_toci_cortisone	0	1	1	0	1	0	0	7gg-	7510	5180	1720	3.011627907	108	199	1.164	3.7	221	2_VM	1_venturi	2
39	female	86	0	1	1	9	9	1	0	0	1	0	0	0	0	0	1	0	2	3	1	0	0	0	0	1_notoci_nocortisone	0	1	1	0	1	0	0	7gg-	5680	3710	1330	2.789473684	1638	260	899	3.75	224	2_VM	1_venturi	3
40	male	36	0	0	0	11	11	0	0	0	0	0	0	0	0	0	0	0	0	0	1	0	1	1	0	1_notoci_nocortisone	0	1	1	0	0	0	0	7gg-	4210	2670	1190	2.243697479	NA	382	506	3	319	1_AA	1_venturi	2
41	male	60	0	0	0	9	9	1	0	0	0	0	0	1	0	0	0	0	2	2	0	0	1	0	1	1_notoci_nocortisone	0	1	1	0	0	1	0	7gg-	6540	4790	1150	4.165217391	368	309	176	5.3	362	1_AA	1_venturi	2
42	male	35	0	0	0	9	9	0	0	0	0	0	0	0	0	0	0	0	0	0	1	0	1	1	0	1_notoci_nocortisone	0	1	1	1	0	1	0	7gg-	3600	2510	740	3.391891892	NA	179	NA	0.3	410	1_AA	0_noventilazione	2
43	female	69	0	0	0	3	3	0	0	0	0	0	0	0	0	0	0	0	0	0	0	0	0	0	0	1_notoci_nocortisone	0	1	1	0	0	1	0	7gg-	4030	2170	1380	1.572463768	433	151	259	0.17	333	1_AA	1_venturi	2
44	female	63	0	0	0	26	26	0	0	0	0	1	0	0	0	0	0	0	2	1	1	0	0	1	0	1_notoci_nocortisone	0	1	0	0	0	0	0	8gg+	3380	1930	1070	1.803738318	NA	213	553	0.24	471	1_AA	1_venturi	2
45	female	80	0	1	1	11	11	1	0	1	0	0	0	0	0	0	1	0	1	3	1	0	0	1	1	2_notoci_cortisone	0	1	0	0	1	0	0	7gg-	5300	4770	290	16.44827586	2095	572	4.473	8.95	146	2_VM	1_venturi	3
46	female	85	0	1	1	4	4	1	1	0	0	0	0	0	1	1	0	0	4	4	1	0	0	1	1	1_notoci_nocortisone	0	1	0	1	1	0	0	7gg-	8250	6390	1510	4.231788079	3791	293	301	13.9	387	2_VM	1_venturi	2
47	male	58	0	0	0	92	92	0	0	1	0	0	0	0	0	0	0	0	2	1	1	0	1	1	1	3_toci_nocortisone	0	1	1	0	0	1	0	8gg+	6180	4780	900	5.311111111	NA	418	NA	3	319	1_AA	1_venturi	3
48	female	60	0	0	0	18	18	0	0	0	0	1	0	0	0	0	1	0	1	2	1	0	0	0	1	1_notoci_nocortisone	0	1	0	1	0	1	0	8gg+	7470	6630	580	11.43103448	490	381	0.67	16.9	257	1_AA	1_venturi	2
49	male	46	0	0	0	14	14	0	0	0	0	0	0	0	0	0	0	0	0	0	0	0	1	1	1	3_toci_nocortisone	0	1	1	0	0	0	1	8gg+	8070	7030	610	11.52459016	NA	302	372	7.7	319	1_AA	1_venturi	2
50	female	43	0	0	0	16	16	1	0	0	0	0	0	0	1	0	0	0	0	2	1	0	0	0	1	2_notoci_cortisone	0	0	0	1	0	0	0	7gg-	8160	6240	1430	4.363636364	381	360	481	9.3	300	1_AA	1_venturi	2
51	male	85	0	0	0	31	31	1	0	0	0	0	0	0	0	0	0	1	0	2	1	0	0	0	1	4_toci_cortisone	0	0	0	0	0	1	0	8gg+	7850	6800	660	10.3030303	1294	256	408	7.6	192	2_VM	1_venturi	3
52	female	75	0	0	0	99	99	1	0	1	0	0	0	0	0	0	0	0	2	2	0	0	0	0	1	2_notoci_cortisone	0	0	1	0	1	1	0	7gg-	3070	2700	250	10.8	NA	390	4.61	1.9	567	1_AA	1_venturi	2
53	female	67	1	1	1	2	6	1	0	1	0	0	0	1	0	0	0	0	1	3	0	0	1	1	1	3_toci_nocortisone	0	1	1	0	1	1	0	7gg-	2880	2210	500	4.42	NA	576	1.678	6.9	281	2_VM	1_venturi	3
54	female	74	0	0	0	12	12	1	1	0	0	1	0	0	1	0	0	0	3	4	1	0	0	0	1	1_notoci_nocortisone	0	0	0	0	0	1	0	7gg-	6150	4570	920	4.967391304	306	299	1.293	5.5	NA	1_AA	0_noventilazione	2
55	male	96	0	0	0	96	96	1	0	0	0	0	0	0	0	0	0	0	1	1	1	0	0	0	1	1_notoci_nocortisone	0	0	0	0	0	1	0	7gg-	7000	5370	1070	5.018691589	374	229	1.139	5.99	376	1_AA	0_noventilazione	2
56	male	70	1	1	1	5	43	1	0	0	0	1	0	0	0	0	0	0	2	2	0	0	0	1	1	4_toci_cortisone	0	1	1	0	1	0	0	8gg+	20600	19730	490	40.26530612	999	465	1.26	46.9	174	3_CPAP	1_venturi	3
57	female	67	0	NA	1	45	45	1	1	1	0	0	0	0	0	0	0	0	7	3	1	0	0	0	1	2_notoci_cortisone	0	1	0	0	1	1	0	7gg-	11950	11200	420	26.66666667	994	302	4.382	27.8	100	2_VM	1_venturi	2
58	male	24	0	0	0	8	8	0	0	0	1	0	0	0	0	0	0	0	0	1	1	0	0	0	NA	1_notoci_nocortisone	0	1	0	0	0	0	0	7gg-	7320	5760	1050	5.485714286	NA	122	NA	NA	402	1_AA	0_noventilazione	2
59	male	47	0	0	0	50	50	0	0	0	0	1	0	0	0	0	1	0	1	2	1	0	0	1	NA	2_notoci_cortisone	0	1	1	0	0	0	0	7gg-	3480	2570	720	3.569444444	1786	313	2.24	6.356	376	1_AA	1_venturi	2
60	female	85	0	0	0	29	29	1	1	0	0	1	0	0	0	0	0	0	2	3	1	0	0	1	1	3_toci_nocortisone	0	1	1	0	0	0	0	7gg-	5830	4270	1000	4.27	NA	NA	1.7	5.4	457	1_AA	1_venturi	3
61	male	45	0	0	0	15	15	0	0	0	0	0	0	0	0	0	0	0	0	0	1	0	1	1	0	1_notoci_nocortisone	0	1	0	0	1	0	0	7gg-	7130	3870	2470	1.566801619	NA	NA	NA	0.14	471	1_AA	0_noventilazione	2
62	female	78	1	1	1	2	44	1	0	0	0	0	0	0	0	0	0	0	1	1	1	0	1	1	1	4_toci_cortisone	0	1	1	0	1	0	0	7gg-	5600	3850	820	4.695121951	NA	NA	NA	2.29	290	1_AA	1_venturi	3
63	male	43	0	0	0	15	15	0	0	0	0	0	0	0	0	0	0	0	0	0	1	0	1	0	1	1_notoci_nocortisone	0	0	1	0	0	0	1	7gg-	5080	3630	560	6.482142857	NA	157	1.1	0.21	467	1_AA	0_noventilazione	1
64	female	77	0	0	0	41	41	1	0	0	0	1	0	0	0	0	0	0	1	2	1	0	1	1	1	1_notoci_nocortisone	0	0	0	0	0	0	0	7gg-	3480	1600	1440	1.111111111	387	212	2.1	0.74	471	1_AA	0_noventilazione	2
65	male	30	0	0	0	6	6	0	1	0	0	0	0	0	0	0	0	0	1	1	1	0	1	1	0	1_notoci_nocortisone	0	1	1	1	0	0	0	7gg-	4290	1520	1280	1.1875	NA	195	NA	0.49	361	1_AA	0_noventilazione	2
67	male	62	0	0	0	16	16	1	0	0	0	0	0	1	0	0	0	0	0	2	1	1	0	0	1	2_notoci_cortisone	0	0	0	0	0	0	0	NA	9140	7980	950	8.4	233	182	0.74	0.41	408	1_AA	1_venturi	2
68	male	44	0	0	0	32	32	0	0	0	0	0	0	0	0	0	0	1	0	1	1	0	1	1	1	4_toci_cortisone	0	1	0	0	1	0	0	7gg-	1560	780	560	1.392857143	653	138	0.52	3.61	359	2_VM	1_venturi	2
69	female	51	0	0	0	25	25	1	0	0	0	0	0	0	1	0	0	0	0	2	1	0	1	1	NA	4_toci_cortisone	0	1	0	1	0	1	0	8gg+	5290	4010	880	4.556818182	316	501	1.6	19.04	230	2_VM	1_venturi	3
70	male	76	0	1	1	14	14	1	1	0	1	0	0	0	0	0	1	0	2	4	1	0	1	1	1	4_toci_cortisone	0	1	1	1	1	0	0	7gg-	8280	6490	1270	5.11023622	2267	307	4.473	24.4	366	1_AA	1_venturi	3
71	male	71	0	0	0	11	11	0	0	1	0	0	0	0	0	0	0	0	2	1	0	0	1	1	1	2_notoci_cortisone	0	0	0	0	1	0	0	7gg-	10590	7690	1960	3.923469388	NA	250	0.94	0.06	418	1_AA	0_noventilazione	2
72	male	60	1	0	1	15	57	0	0	1	0	0	0	0	0	0	0	1	2	2	1	0	1	1	1	4_toci_cortisone	0	1	0	0	0	0	0	8gg+	5630	4370	480	9.104166667	1569	785	4.473	22.72	175	1_AA	1_venturi	3
73	female	92	0	NA	1	31	31	1	0	0	0	1	0	0	0	1	0	0	2	3	1	0	1	1	1	2_notoci_cortisone	0	0	0	0	0	0	0	NA	8820	5480	2180	2.513761468	25	214	2.44	5.1	330	2_VM	1_venturi	3
74	male	85	0	NA	1	31	31	1	0	0	0	0	0	0	0	1	0	0	2	2	1	0	1	1	1	1_notoci_nocortisone	0	0	0	0	0	0	0	NA	6790	4090	1730	2.36416185	174	155	1.92	0.36	308	2_VM	1_venturi	1
75	female	52	0	0	0	29	29	0	0	0	0	0	0	0	0	0	0	0	0	0	1	0	1	1	NA	4_toci_cortisone	0	1	1	0	1	0	0	8gg+	5930	4980	670	7.432835821	533	580	0.2	2.87	148	2_VM	1_venturi	3
76	female	66	0	0	0	26	26	0	0	0	0	0	0	0	0	0	1	0	0	1	1	0	1	1	1	1_notoci_nocortisone	0	1	0	0	0	1	0	7gg-	7530	4990	1790	2.787709497	NA	134	0.38	0.48	409	1_AA	0_noventilazione	1
77	female	47	0	0	0	11	11	0	0	0	0	0	0	0	0	0	0	0	0	0	0	0	1	1	0	1_notoci_nocortisone	0	1	0	0	0	1	0	7gg-	8130	6630	1150	5.765217391	26	224	4.24	0.19	464	1_AA	0_noventilazione	2
78	male	62	0	0	0	24	24	1	0	1	0	0	0	0	0	0	0	0	2	2	1	0	1	1	1	1_notoci_nocortisone	0	1	1	0	1	0	0	7gg-	7130	5680	880	6.454545455	566	261	NA	15.59	304	1_AA	0_noventilazione	2
79	female	88	0	NA	1	2	2	1	0	0	0	0	0	0	0	0	0	0	0	1	1	0	0	0	0	1_notoci_nocortisone	0	0	0	0	1	0	0	7gg-	16890	14830	1310	11.32061069	3331	320	4.473	NA	294	2_VM	1_venturi	3
80	male	40	0	0	0	13	13	0	0	0	0	0	0	0	0	0	0	0	0	0	0	0	0	1	0	1_notoci_nocortisone	0	1	1	0	0	0	0	8gg+	6040	3960	1510	2.622516556	447	221	0.38	0.07	439	1_AA	0_noventilazione	2
81	female	75	1	1	1	1	7	0	0	0	0	0	1	0	1	0	0	0	0	2	1	0	1	1	1	2_notoci_cortisone	0	1	0	0	0	0	0	8gg+	5.38	4.3	0.9	4.777777778	NA	NA	4.34	12.71	120	3_CPAP	2_casco	3
82	male	61	0	0	0	10	10	0	0	0	0	0	0	0	0	0	0	0	0	0	1	0	0	1	1	4_toci_cortisone	1	1	0	0	0	0	0	8gg+	4480	3130	840	3.726190476	508	226	0.48	4.5	298	2_VM	1_venturi	3
83	male	64	0	0	0	24	24	1	0	0	0	0	0	0	0	0	0	0	0	1	1	0	1	1	1	4_toci_cortisone	0	1	1	0	0	0	0	8gg+	8950	7170	1190	6.025210084	NA	NA	NA	21.26	323	1_AA	1_venturi	3
84	male	61	1	0	1	2	83	0	0	0	0	0	0	0	0	0	0	0	0	0	1	0	1	1	1	4_toci_cortisone	0	1	0	0	1	0	0	7gg-	15320	13390	900	14.87777778	386	583	NA	18.27	115	2_VM	1_venturi	3
85	female	48	0	0	0	9	9	1	0	0	0	0	0	0	0	0	0	0	1	1	1	0	1	1	0	2_notoci_cortisone	0	1	1	0	1	0	0	7gg-	4030	2870	920	3.119565217	NA	324	NA	3.75	236	2_VM	1_venturi	3
86	male	74	0	0	0	27	27	0	0	0	0	0	0	1	0	0	0	0	0	1	1	0	1	1	1	4_toci_cortisone	0	1	0	0	0	0	0	7gg-	4430	3250	740	4.391891892	554	356	1.88	1.42	319	1_AA	1_venturi	3
87	female	89	0	0	0	3	3	0	1	0	0	0	0	0	0	0	0	0	2	1	0	0	0	0	1	1_notoci_nocortisone	0	0	0	0	0	0	0	NA	10560	7740	2000	3.87	NA	257	NA	0.24	400	1_AA	0_noventilazione	2
88	male	45	0	0	0	19	19	1	1	0	0	0	0	0	0	0	0	0	1	2	1	0	1	1	1	2_notoci_cortisone	0	1	1	0	1	0	0	7gg-	8640	7900	740	10.67567568	NA	344	NA	10	434	1_AA	0_noventilazione	2
89	male	77	1	1	1	30	38	1	0	0	0	0	0	1	0	0	0	0	0	2	1	0	1	1	1	4_toci_cortisone	0	1	1	0	0	1	0	7gg-	3470	1370	1200	1.141666667	NA	153	NA	NA	429	1_AA	1_venturi	3
90	female	35	0	0	0	11	11	0	0	0	0	0	0	0	0	0	0	0	0	0	1	0	1	1	0	1_notoci_nocortisone	0	1	1	1	0	0	0	8gg+	3500	2190	950	2.305263158	NA	247	NA	4.83	372	1_AA	1_venturi	2
91	male	60	0	0	0	20	20	1	0	0	0	0	0	0	0	0	0	0	0	1	1	0	1	1	1	4_toci_cortisone	0	1	0	0	1	1	0	8gg+	5970	4470	1090	4.100917431	2589	391	1.62	9.6	218	2_VM	1_venturi	3
92	female	83	0	1	1	11	11	1	0	0	0	1	0	0	0	1	0	0	2	3	1	0	1	1	1	2_notoci_cortisone	0	1	0	0	0	0	0	7gg-	7.04	4.12	2.45	1.681632653	NA	333	4.473	5.35	171	2_VM	1_venturi	3
93	male	65	0	0	0	10	10	1	0	0	0	0	0	0	0	0	0	0	0	1	0	0	0	1	0	1_notoci_nocortisone	0	0	0	0	0	0	0	NA	11470	7040	2890	2.435986159	NA	253	0.84	0.26	462	1_AA	0_noventilazione	2
94	male	55	0	0	0	11	11	0	0	0	0	0	0	0	0	0	0	0	0	0	0	0	1	0	0	2_notoci_cortisone	0	1	1	0	0	0	0	7gg-	5410	3320	1590	2.088050314	429	228	0.54	1.71	350	1_AA	0_noventilazione	2
95	male	42	0	0	0	13	13	0	0	0	0	0	0	0	0	0	0	0	0	0	1	0	1	1	1	3_toci_nocortisone	0	1	1	0	1	1	0	7gg-	7090	3800	2310	1.645021645	1989	237	2.36	3.2	363	1_AA	1_venturi	2
96	male	56	0	0	0	8	8	0	0	0	0	0	0	0	0	0	0	0	0	0	1	0	1	1	0	2_notoci_cortisone	0	1	1	0	1	0	1	8gg+	8130	5870	1650	3.557575758	177	186	1.04	0.14	370	1_AA	1_venturi	2
97	male	66	0	0	0	14	14	1	0	0	0	0	0	0	0	0	0	0	0	1	0	0	1	1	0	1_notoci_nocortisone	0	1	1	0	0	0	0	7gg-	5010	2960	1580	1.873417722	NA	265	NA	3.78	258	2_VM	1_venturi	2
98	male	70	0	0	0	29	29	1	0	0	0	0	0	0	0	0	0	0	1	1	0	1	0	0	1	4_toci_cortisone	0	1	0	0	0	1	0	8gg+	3890	2430	970	2.505154639	797	321	0.82	8.2	152	2_VM	1_venturi	3
99	male	75	0	0	0	14	14	1	0	0	0	1	0	1	0	0	1	1	3	5	1	0	1	1	0	1_notoci_nocortisone	0	1	0	0	1	0	0	8gg+	4088	3360	1170	2.871794872	370	195	0.84	1.05	328	2_VM	1_venturi	2
100	female	40	0	0	0	4	4	0	0	0	0	0	0	0	0	0	1	0	0	1	1	0	1	1	0	1_notoci_nocortisone	0	1	1	0	0	0	1	7gg-	2880	1230	1280	0.9609375	22	179	0.9	0.04	512	1_AA	0_noventilazione	2
101	female	42	0	0	0	10	10	0	0	0	0	0	0	0	0	0	0	0	0	0	1	0	1	1	1	1_notoci_nocortisone	0	1	1	0	1	1	0	8gg+	9960	7510	1830	4.103825137	NA	217	NA	0.24	494	1_AA	0_noventilazione	2
102	female	51	0	0	0	5	5	1	0	0	0	1	0	0	0	0	0	0	1	2	1	0	1	1	0	1_notoci_nocortisone	0	1	1	0	1	1	0	8gg+	2982	1630	1090	1.495412844	166	251	3.44	0.37	381	1_AA	0_noventilazione	2
103	male	52	0	0	0	12	12	0	0	0	0	1	0	0	0	0	0	0	1	1	1	0	0	1	0	1_notoci_nocortisone	0	1	0	0	0	0	0	7gg-	5.46	3180	1550	2.051612903	96	179	1.52	0.2	402	1_AA	1_venturi	1
104	female	40	0	0	0	44	44	0	0	0	0	1	0	0	0	0	0	0	1	1	1	0	1	0	1	2_notoci_cortisone	1	1	1	0	0	1	0	7gg-	5490	2980	1940	1.536082474	NA	294	0.94	1.21	382	1_AA	0_noventilazione	2
105	female	86	0	NA	1	53	53	1	0	0	0	0	0	0	0	1	0	0	1	2	1	0	1	1	1	2_notoci_cortisone	0	0	1	0	0	0	0	7gg-	4150	1710	1740	0.982758621	72	191	2.34	0.55	322	1_AA	0_noventilazione	2
106	male	78	0	1	1	23	23	1	1	0	0	1	0	0	0	0	0	0	3	3	1	0	1	1	1	4_toci_cortisone	0	1	1	0	1	0	0	8gg+	4450	9810	1370	7.160583942	NA	381	4.473	5.25	309	1_AA	1_venturi	3
107	female	94	0	0	0	9	9	1	0	0	0	0	0	0	0	1	0	0	1	2	1	0	0	0	1	1_notoci_nocortisone	0	1	0	0	0	1	0	8gg+	7380	6270	680	9.220588235	NA	200	NA	12.58	342	1_AA	0_noventilazione	2
108	female	56	0	0	0	31	31	1	1	0	0	0	0	0	0	0	0	1	1	3	1	0	1	1	1	4_toci_cortisone	0	1	1	0	0	0	0	8gg+	3930	1890	1610	1.173913043	NA	364	0.9	1.7	320	1_AA	1_venturi	3
109	male	70	0	0	0	23	23	0	0	1	1	0	0	0	0	0	0	0	4	2	1	0	1	1	0	4_toci_cortisone	0	1	0	0	0	1	0	7gg-	3550	3.21	0.13	24.69230769	2690	487	3.06	10.48	458	1_AA	1_venturi	3
110	female	79	0	0	0	21	21	1	1	1	0	1	0	1	0	0	0	0	4	5	1	0	0	1	1	3_toci_nocortisone	0	0	0	0	0	0	0	NA	8310	5410	2000	2.705	17	202	3.32	1.13	348	1_AA	1_venturi	3
111	female	48	0	0	0	4	4	0	0	0	0	0	0	0	0	0	0	0	0	0	1	0	1	1	0	1_notoci_nocortisone	0	1	1	0	1	1	1	8gg+	10360	7410	2100	3.528571429	NA	213	NA	0.06	462	1_AA	0_noventilazione	2
112	male	56	0	0	0	6	6	0	0	0	0	0	0	0	0	0	0	0	0	0	1	0	0	0	1	2_notoci_cortisone	0	0	0	0	1	0	0	7gg-	6180	2690	2580	1.042635659	NA	239	0.56	0.1	376	1_AA	1_venturi	2
113	female	60	0	0	0	26	26	0	0	0	0	1	0	0	0	0	1	0	1	2	1	0	0	1	1	4_toci_cortisone	0	0	0	0	0	1	0	7gg-	7820	4510	1800	2.505555556	104	210	NA	0.66	357	1_AA	1_venturi	2
114	male	61	0	0	0	24	24	1	0	0	0	0	0	1	1	0	0	0	0	3	1	1	0	0	1	2_notoci_cortisone	0	1	0	0	0	0	0	7gg-	4910	3300	870	3.793103448	230	181	0.38	1.45	300	1_AA	1_venturi	2
115	male	55	0	0	0	12	12	0	0	0	0	0	0	0	0	0	0	0	0	0	1	0	1	1	0	2_notoci_cortisone	0	1	1	0	1	0	0	8gg+	12400	10640	1110	9.585585586	NA	514	NA	6.93	323	1_AA	1_venturi	3
116	female	21	0	0	0	24	24	0	0	0	0	0	0	1	0	0	0	0	0	1	1	0	1	1	0	4_toci_cortisone	0	1	1	0	0	1	0	8gg+	6450	5150	1040	4.951923077	NA	283	NA	3.36	174	2_VM	1_venturi	3
117	male	84	0	1	1	27	27	1	0	0	0	0	0	0	0	0	0	0	2	1	1	0	0	1	1	2_notoci_cortisone	NA	0	1	0	0	0	0	7gg-	NA	7700	900	8.555555556	NA	512	4.473	18.4	392	1_AA	1_venturi	3
118	female	51	0	0	0	13	13	0	0	0	0	0	0	0	0	0	1	0	0	1	1	0	1	1	0	1_notoci_nocortisone	0	1	1	0	0	0	0	7gg-	3860	2320	970	2.391752577	NA	229	NA	0.25	558	1_AA	0_noventilazione	2
119	female	85	0	0	0	50	50	1	0	0	0	0	0	1	0	0	0	0	0	2	1	0	1	1	1	1_notoci_nocortisone	0	1	1	1	0	0	0	7gg-	4160	3190	550	5.8	NA	212	NA	1.08	298	2_VM	1_venturi	3
120	male	76	0	0	0	27	27	1	0	0	1	1	0	0	0	0	0	0	3	3	1	0	1	1	0	4_toci_cortisone	0	1	0	0	0	1	0	7gg-	6960	6230	640	9.734375	366	223	1.36	3.7	304	1_AA	1_venturi	3
121	male	81	0	0	0	4	4	1	1	0	0	0	0	0	0	0	0	0	1	2	1	0	1	1	1	2_notoci_cortisone	0	0	0	0	0	0	0	NA	14.62	12.92	0.81	15.95061728	NA	593	4.473	29.24	134	3_CPAP	2_casco	3
122	female	70	0	0	0	37	37	1	0	0	0	1	0	0	0	0	0	0	1	2	1	0	1	1	1	4_toci_cortisone	NA	1	1	0	0	0	0	7gg-	2760	1630	840	1.94047619	NA	185	NA	0.17	400	1_AA	1_venturi	3
123	male	65	0	0	0	27	27	1	1	1	1	1	1	1	1	1	1	0	NA	10	1	0	1	1	1	4_toci_cortisone	0	1	1	0	0	1	0	8gg+	5850	4050	1350	3	907	276	NA	15.1	328	1_AA	1_venturi	3
124	female	77	0	0	0	15	15	1	0	0	0	0	0	0	0	0	0	0	0	1	1	0	1	1	1	4_toci_cortisone	NA	NA	0	NA	NA	NA	0	NA	13650	11980	1190	10.06722689	NA	295	NA	21.99	218	2_VM	1_venturi	3
125	female	58	0	0	0	14	14	0	0	0	0	0	0	1	0	0	0	0	0	1	1	0	1	1	0	1_notoci_nocortisone	0	1	1	0	0	1	0	7gg-	4290	2670	1210	2.20661157	NA	229	NA	2.15	361	1_AA	0_noventilazione	2
126	female	59	0	0	0	35	35	0	0	0	0	0	0	0	0	0	0	1	0	1	1	0	0	1	0	1_notoci_nocortisone	NA	0	0	0	1	0	0	7gg-	11720	6740	4090	1.64792176	NA	180	1.7	0.67	460	1_AA	0_noventilazione	1
127	male	57	0	0	0	23	23	0	0	0	0	0	0	0	0	0	0	1	0	1	1	0	1	1	1	1_notoci_nocortisone	0	1	1	0	0	1	0	8gg+	6160	352	1750	0.201142857	379	184	4.473	7.52	457	1_AA	0_noventilazione	2
128	female	89	0	0	0	27	27	1	0	0	0	0	0	0	0	1	0	0	5	2	1	0	0	1	1	2_notoci_cortisone	0	1	0	1	0	0	0	7gg-	3220	2050	740	2.77027027	164	304	NA	2.13	278	1_AA	1_venturi	3
129	female	28	0	0	0	37	37	0	1	0	1	0	1	0	0	0	0	1	3	4	1	0	1	0	0	2_notoci_cortisone	0	1	0	0	0	1	0	7gg-	3350	1730	1000	1.73	56	186	4.473	0.3	466	1_AA	0_noventilazione	1
130	female	58	0	0	0	14	14	0	0	0	0	0	0	1	0	0	0	0	0	1	0	0	1	1	0	1_notoci_nocortisone	0	1	0	0	1	0	0	7gg-	5120	3180	1330	2.390977444	NA	NA	2.08	0.2	462	1_AA	1_venturi	2
131	male	56	0	0	0	18	18	1	0	0	1	0	0	0	0	0	0	0	2	2	1	0	1	1	1	1_notoci_nocortisone	0	1	0	0	0	0	0	7gg-	3440	2570	480	5.354166667	493	NA	0.88	1.39	413	1_AA	1_venturi	2
132	female	77	0	0	0	30	30	0	0	0	0	0	0	1	0	0	0	0	0	1	1	0	1	1	NA	4_toci_cortisone	0	1	1	0	1	0	0	7gg-	14710	12570	1280	9.8203125	NA	278	NA	3.39	166	2_VM	1_venturi	3
133	male	55	0	0	0	15	15	1	0	0	0	0	0	0	0	0	0	0	0	1	1	0	1	1	1	4_toci_cortisone	NA	NA	0	NA	NA	NA	0	NA	6790	5770	730	7.904109589	NA	305	NA	9.97	152	3_CPAP	2_casco	3
134	male	53	0	0	0	19	19	0	0	0	0	0	0	0	0	0	0	0	0	0	1	0	1	1	1	4_toci_cortisone	0	1	1	0	0	0	0	7gg-	2380	1260	880	1.431818182	234	231	0.5	2.05	230	2_VM	1_venturi	3
135	male	84	0	0	0	35	35	0	1	0	0	0	0	0	0	0	0	0	2	1	1	0	1	1	1	4_toci_cortisone	0	1	1	0	1	0	0	7gg-	3510	2340	870	2.689655172	90	287	NA	5.9	263	2_VM	1_venturi	3
136	male	70	0	NA	1	12	12	0	0	0	0	0	0	0	0	0	0	0	0	0	1	0	1	1	1	4_toci_cortisone	0	1	0	0	1	1	0	7gg-	12.5	9.45	2.15	4.395348837	NA	430	NA	11.56	150	2_VM	1_venturi	3
137	male	80	0	1	1	57	57	1	1	0	0	0	0	0	0	0	0	0	2	2	1	0	1	1	1	4_toci_cortisone	NA	0	1	0	0	1	0	8gg+	12.93	12.08	0.42	28.76190476	NA	475	NA	6.24	190	2_VM	1_venturi	3
138	female	65	0	0	0	17	17	0	0	0	0	0	0	0	0	0	0	0	0	0	1	0	1	1	1	4_toci_cortisone	0	1	1	0	0	0	0	8gg+	8970	7240	1240	5.838709677	NA	424	NA	18.81	154	2_VM	1_venturi	3
139	female	72	0	0	0	14	14	0	0	0	0	0	0	0	0	0	0	0	0	0	1	0	1	1	0	2_notoci_cortisone	0	1	1	0	0	0	0	8gg+	11290	1004	770	1.303896104	NA	284	4.473	3.06	300	2_VM	1_venturi	2
140	male	69	0	0	0	3	3	0	0	0	0	0	0	0	0	0	1	0	0	1	0	0	0	0	0	1_notoci_nocortisone	0	0	0	0	0	0	0	7gg-	5850	3190	1880	1.696808511	185	231	1.3	0.6	462	1_AA	0_noventilazione	1
141	female	54	0	0	0	22	22	0	0	0	0	0	0	0	0	0	0	0	0	0	1	0	1	1	0	4_toci_cortisone	0	1	1	1	0	0	0	7gg-	4220	2800	1020	2.745098039	497	328	0.7	1.53	333	1_AA	1_venturi	3
142	male	27	0	0	0	7	7	0	0	0	0	0	0	0	0	0	0	0	0	0	1	0	1	1	0	2_notoci_cortisone	0	1	1	0	0	0	0	8gg+	12820	11000	940	11.70212766	NA	278	NA	2.39	462	1_AA	1_venturi	3
143	female	59	0	1	1	56	56	1	0	0	1	1	0	0	0	0	0	0	4	3	1	0	1	0	1	4_toci_cortisone	0	1	0	0	0	1	0	7gg-	3680	2100	620	3.387096774	4025	250	1.5	1.16	361	1_AA	1_venturi	3
144	male	56	0	0	0	34	34	0	0	0	0	0	0	0	0	0	0	0	0	0	1	0	1	1	1	4_toci_cortisone	0	1	0	0	1	1	0	7gg-	11150	10110	610	16.57377049	NA	522	NA	32	265	2_VM	1_venturi	3
145	female	95	0	0	0	29	29	0	0	0	0	0	0	0	0	0	0	0	0	0	1	0	1	1	1	4_toci_cortisone	0	1	0	0	0	1	0	7gg-	4520	3590	630	5.698412698	NA	433	1.56	11.1	200	2_VM	1_venturi	3
146	female	77	1	0	1	10	34	0	0	0	0	1	0	0	1	0	0	0	1	2	1	0	1	1	1	4_toci_cortisone	0	1	0	0	0	0	0	8gg+	10420	9130	870	10.49425287	634	351	4.473	18.54	172	2_VM	1_venturi	3
147	female	44	0	0	0	4	4	0	0	0	0	0	0	0	0	0	0	0	0	0	0	0	0	0	0	1_notoci_nocortisone	0	0	0	0	0	0	0	NA	5220	3350	980	3.418367347	NA	165	NA	0.15	441	1_AA	0_noventilazione	1
148	male	55	0	0	0	17	17	0	0	0	0	0	0	1	0	0	0	0	0	1	1	0	1	1	1	1_notoci_nocortisone	0	0	0	0	0	0	0	NA	5640	3130	1930	1.621761658	NA	181	0.8	0.12	380	1_AA	0_noventilazione	2
149	male	56	0	0	0	25	25	1	0	0	0	0	0	0	0	0	0	0	0	1	1	0	1	1	1	4_toci_cortisone	0	1	1	0	1	0	0	8gg+	10270	6520	2140	3.046728972	259	NA	1.1	1.16	287	1_AA	1_venturi	3
150	male	52	0	0	0	11	11	1	0	0	0	0	0	0	0	0	0	0	0	1	1	1	0	0	1	1_notoci_nocortisone	0	0	0	0	0	0	0	NA	4270	2090	1630	1.282208589	346	NA	4.473	0.76	409	1_AA	0_noventilazione	2
151	male	64	0	0	0	40	40	0	0	1	1	1	0	0	0	0	0	0	5	3	1	0	1	1	1	1_notoci_nocortisone	0	1	1	0	0	0	0	8gg+	5400	3530	1480	2.385135135	NA	494	NA	11.48	469	2_VM	1_venturi	3
152	female	82	0	1	1	26	26	1	1	0	0	0	0	0	0	0	0	0	1	2	1	0	1	1	1	4_toci_cortisone	0	0	1	0	1	0	0	7gg-	6820	5550	910	6.098901099	NA	570	2.1	13.07	148	3_CPAP	1_venturi	3
153	male	84	0	1	1	10	10	1	0	0	1	0	0	0	0	1	0	0	4	3	1	0	1	1	1	4_toci_cortisone	0	1	0	0	1	0	0	7gg-	4350	2240	1600	1.4	7996	382	1.66	13.54	155	1_AA	1_venturi	3
154	male	51	0	0	0	25	25	1	0	0	0	0	0	0	0	0	0	0	0	1	1	0	1	1	1	4_toci_cortisone	0	1	1	0	0	0	0	7gg-	7220	5240	1420	3.690140845	213	299	0.7	2.88	347	1_AA	1_venturi	3
155	male	57	0	0	0	38	38	1	0	0	0	0	0	0	0	0	0	0	0	1	1	0	1	1	1	4_toci_cortisone	0	1	1	1	0	0	0	7gg-	3350	2300	770	2.987012987	2160	364	NA	9.85	370	2_VM	1_venturi	3
156	female	90	0	1	1	2	2	1	0	0	0	0	0	0	0	0	0	0	0	1	0	0	0	0	0	1_notoci_nocortisone	0	0	0	0	1	0	0	8gg+	5820	5480	290	18.89655172	16	248	NA	3.56	235	2_VM	1_venturi	3
157	female	81	0	1	1	6	6	1	0	0	0	0	0	0	0	1	0	0	1	2	1	0	0	1	1	1_notoci_nocortisone	0	1	0	1	0	0	0	8gg+	3900	1520	1720	0.88372093	78	2.02	4.08	0.21	395	1_AA	1_venturi	3
158	male	83	0	1	1	3	3	1	0	0	0	0	1	0	0	0	0	0	0	2	1	0	1	1	0	2_notoci_cortisone	1	1	1	0	1	1	0	8gg+	5330	3620	1610	2.248447205	NA	422	NA	24.06	124	1_AA	2_casco	3
159	male	56	0	0	0	44	44	0	0	0	0	0	0	0	0	0	0	0	0	0	1	0	1	1	1	4_toci_cortisone	1	1	0	0	1	0	0	8gg+	4050	2650	1080	2.453703704	NA	NA	NA	2.07	337	2_VM	1_venturi	3
160	female	91	0	0	0	53	53	0	0	0	0	0	0	0	0	1	0	0	1	1	1	0	0	1	1	1_notoci_nocortisone	0	0	0	0	0	0	0	NA	9130	6630	2210	3	NA	456	1.62	14.9	300	1_AA	0_noventilazione	2
161	female	52	0	0	0	5	5	0	0	0	0	0	0	0	0	0	0	0	0	0	1	0	1	1	0	2_notoci_cortisone	0	1	1	1	0	0	0	7gg-	5360	3690	1400	2.635714286	99	191	1.42	0.8	447	1_AA	0_noventilazione	2
162	female	64	0	0	0	33	33	0	0	0	0	0	0	0	0	0	0	0	0	0	1	0	1	1	1	4_toci_cortisone	0	1	1	0	1	1	0	7gg-	5230	3490	1310	2.664122137	409	285	2.24	1.54	340	2_VM	1_venturi	3
163	male	57	0	0	0	6	6	0	0	0	0	1	0	0	0	0	0	0	1	1	1	0	1	1	0	1_notoci_nocortisone	0	1	0	0	0	0	0	7gg-	4930	3490	990	3.525252525	NA	230	NA	0.52	352	1_AA	0_noventilazione	2
164	male	57	1	0	1	24	70	0	0	0	0	0	0	0	0	0	0	0	0	0	1	1	1	1	1	4_toci_cortisone	0	1	0	0	1	0	0	7gg-	7720	6530	980	6.663265306	NA	262	NA	5.97	108	2_VM	1_venturi	3
165	female	48	0	0	0	14	14	0	0	0	0	0	0	0	0	0	0	0	0	0	1	0	1	0	0	2_notoci_cortisone	0	1	1	0	0	0	0	8gg+	2290	560	1150	0.486956522	NA	NA	NA	6.11	338	1_AA	0_noventilazione	2
166	male	72	0	NA	1	38	38	0	0	1	0	0	0	0	0	0	0	0	2	1	1	0	1	1	1	2_notoci_cortisone	0	1	0	0	0	0	0	7gg-	3270	2.59	0.53	4.886792453	NA	265	NA	14.11	170	2_VM	1_venturi	3
167	male	32	0	0	0	19	19	0	0	0	0	0	0	0	0	0	0	0	0	0	0	0	1	0	1	1_notoci_nocortisone	0	0	0	0	0	0	0	NA	8000	5200	2380	2.18487395	100	217	4.473	0.05	497	1_AA	0_noventilazione	1
168	female	54	0	0	0	31	31	0	0	0	0	0	0	0	0	0	0	0	0	0	1	0	1	1	0	1_notoci_nocortisone	0	1	0	1	0	0	0	8gg+	4920	3400	1080	3.148148148	NA	182	NA	1.02	361	1_AA	0_noventilazione	2
169	female	72	0	0	0	12	12	0	0	0	0	0	0	0	0	0	0	0	0	0	0	0	0	0	1	1_notoci_nocortisone	0	0	0	0	1	0	0	7gg-	6190	3490	1950	1.78974359	NA	183	4.473	0.11	457	1_AA	0_noventilazione	2
170	male	65	0	0	0	11	11	0	0	0	0	0	0	0	0	0	0	0	0	0	1	0	1	1	0	2_notoci_cortisone	0	1	1	0	0	0	0	7gg-	3240	2080	880	2.363636364	NA	212	NA	NA	400	1_AA	0_noventilazione	2
171	female	51	0	0	0	28	28	0	0	0	0	0	0	0	0	0	0	0	0	0	1	0	1	1	1	4_toci_cortisone	0	0	1	0	1	0	1	7gg-	6800	5870	890	6.595505618	354	236	0.94	0.09	414	1_AA	1_venturi	3
172	male	46	0	0	0	96	96	1	1	0	0	0	0	0	0	0	0	1	1	3	1	0	0	0	1	2_notoci_cortisone	0	0	0	0	0	0	0	NA	10240	6740	2000	3.37	75	230	0.52	0.63	378	1_AA	1_venturi	2
173	male	37	0	0	0	23	23	0	0	0	0	0	0	0	0	0	0	0	0	0	1	1	0	0	1	1_notoci_nocortisone	NA	0	1	0	0	0	0	7gg-	2960	1620	1040	1.557692308	836	285	3.16	1.13	364	1_AA	1_venturi	2
174	male	42	0	0	0	16	16	0	0	0	0	0	0	0	0	0	0	0	0	0	1	0	1	1	0	4_toci_cortisone	0	1	1	0	0	0	0	7gg-	6150	4530	1350	3.355555556	606	339	1.7	12.13	287	1_AA	1_venturi	3
175	male	64	0	0	0	29	29	0	0	0	0	0	0	0	0	0	0	0	0	0	1	0	1	1	1	4_toci_cortisone	0	1	1	0	0	0	0	8gg+	8750	5130	2680	1.914179104	NA	443	3.76	21.56	465	1_AA	1_venturi	3
176	female	64	0	0	0	63	63	0	0	0	1	0	0	0	0	0	1	0	2	2	1	0	1	0	1	4_toci_cortisone	0	1	1	0	0	0	0	7gg-	3690	2790	800	3.4875	1266	145	1.24	1.57	286	1_AA	1_venturi	3
177	male	64	0	0	0	8	8	1	0	0	0	0	0	0	0	0	0	0	1	1	1	0	1	1	1	4_toci_cortisone	0	1	1	0	0	0	0	8gg+	4020	3320	600	5.533333333	464	239	NA	3.14	233	2_VM	1_venturi	3
178	male	52	0	0	0	15	15	0	0	0	0	0	0	0	0	0	0	0	0	0	1	0	1	1	1	1_notoci_nocortisone	0	0	0	0	0	1	1	7gg-	6200	4230	1490	2.838926174	233	176	0.92	0.05	519	1_AA	0_noventilazione	2
179	male	55	1	1	1	1	37	0	1	0	0	0	0	0	0	0	0	0	NA	1	1	1	1	1	1	4_toci_cortisone	0	1	1	0	0	0	0	7gg-	7990	6730	730	9.219178082	NA	556	3.2	15.87	277	1_AA	0_noventilazione	3
180	male	76	0	0	0	9	9	1	0	0	0	0	0	0	0	0	0	0	0	1	1	0	0	1	1	1_notoci_nocortisone	0	1	1	1	0	0	0	8gg+	6940	4280	1010	4.237623762	293	172	0.92	0.09	373	1_AA	1_venturi	3
181	male	49	0	0	0	16	16	0	0	0	0	0	0	0	0	0	0	0	0	0	1	0	1	1	0	4_toci_cortisone	0	1	1	0	0	0	0	7gg-	3780	2880	700	4.114285714	514	225	0.7	1.89	371	1_AA	1_venturi	3
182	male	37	0	0	0	11	11	0	0	0	0	0	0	0	0	0	0	0	0	0	1	0	1	1	0	1_notoci_nocortisone	0	1	1	0	0	1	0	7gg-	4070	2180	1480	1.472972973	NA	216	NA	0.44	250	1_AA	1_venturi	3
183	male	45	0	0	0	18	18	0	0	0	0	0	0	0	0	0	0	0	0	0	1	0	1	1	0	4_toci_cortisone	0	1	1	0	1	0	0	7gg-	4380	3750	430	8.720930233	NA	465	NA	6.04	165	3_CPAP	1_venturi	3
184	male	62	0	0	0	41	41	0	0	1	0	0	0	0	1	0	1	0	1	3	1	0	1	1	1	4_toci_cortisone	0	1	0	0	0	1	0	7gg-	5210	2790	1860	1.5	757	319	NA	1.84	370	1_AA	1_venturi	3
185	male	84	0	0	0	43	43	1	0	0	0	1	0	0	1	0	0	0	2	3	1	0	1	1	1	4_toci_cortisone	0	1	0	0	1	0	0	7gg-	5460	4570	760	6.013157895	NA	417	NA	NA	172	2_VM	1_venturi	3
186	male	70	0	0	0	17	17	1	1	1	1	1	1	1	1	1	1	0	NA	10	1	0	1	1	1	4_toci_cortisone	0	NA	0	NA	NA	NA	0	NA	5330	3520	1380	2.550724638	1071	198	0.78	6.25	414	1_AA	2_casco	3
187	female	63	0	0	0	2	2	0	0	0	0	0	0	0	0	0	0	0	0	0	0	0	0	0	0	1_notoci_nocortisone	0	0	0	0	1	0	0	7gg-	4320	2330	1490	1.563758389	17	199	NA	0.08	423	1_AA	0_noventilazione	1
188	female	52	0	0	0	34	34	0	0	0	0	0	0	0	0	0	1	0	0	1	1	0	1	1	1	1_notoci_nocortisone	0	1	1	0	0	0	0	8gg+	5300	3790	1090	3.47706422	NA	176	0.38	0.16	350	1_AA	0_noventilazione	2
189	male	61	0	0	0	34	34	0	0	0	0	0	0	0	0	0	0	0	0	0	1	0	1	1	1	4_toci_cortisone	0	1	1	0	0	0	0	7gg-	8980	8250	470	17.55319149	1760	NA	0.94	NA	195	2_VM	1_venturi	3
190	male	45	0	0	0	38	38	1	0	0	0	0	0	0	0	0	0	0	0	1	1	0	1	1	1	4_toci_cortisone	1	0	1	0	0	0	0	7gg-	6650	3290	2150	1.530232558	561	NA	0.4	0.76	399	2_VM	1_venturi	3
191	male	48	0	0	0	30	30	0	0	0	0	0	0	0	0	0	0	0	0	0	1	0	1	1	1	4_toci_cortisone	0	1	0	0	1	0	0	7gg-	10790	7930	1500	5.286666667	NA	NA	NA	1.09	324	2_VM	1_venturi	3
192	male	66	0	0	0	35	35	0	0	0	0	1	0	0	0	1	0	0	2	2	1	0	1	1	1	1_notoci_nocortisone	0	0	0	0	0	0	0	NA	4540	3060	900	3.4	NA	253	1.06	0.26	380	1_AA	1_venturi	3
194	male	85	0	0	0	30	30	1	1	0	0	0	0	0	0	0	0	0	1	2	1	0	1	1	1	4_toci_cortisone	0	0	1	0	1	0	0	7gg-	8380	5590	1250	4.472	NA	203	2.14	0.87	242	2_VM	1_venturi	3
196	male	72	0	0	0	21	21	0	0	0	0	1	0	1	0	0	0	0	1	2	1	0	1	1	1	4_toci_cortisone	0	1	1	0	1	0	0	8gg+	10610	9500	760	12.5	690	333	0.98	17.88	233	2_VM	1_venturi	3
197	female	39	0	0	0	19	19	0	0	0	0	0	0	0	0	0	0	0	0	0	0	0	0	1	1	1_notoci_nocortisone	0	1	0	0	0	0	0	7gg-	3890	2310	1030	2.242718447	50	163	2.2	0.5	397	1_AA	0_noventilazione	2
198	male	57	0	0	0	17	17	0	0	0	0	0	0	0	0	0	0	0	0	0	1	0	1	1	1	4_toci_cortisone	0	1	0	0	0	0	0	7gg-	9500	7840	1230	6.37398374	2441	401	1.84	9.68	316	1_AA	1_venturi	3
200	male	66	0	0	0	11	11	0	0	0	0	0	0	0	0	0	0	1	0	1	1	0	0	1	0	1_notoci_nocortisone	0	0	0	0	0	0	0	NA	9240	3780	4580	0.825327511	NA	214	4.22	2.57	450	1_AA	0_noventilazione	2
201	female	36	0	0	0	13	13	0	0	0	0	0	0	0	0	0	0	0	0	0	0	0	1	0	1	2_notoci_cortisone	0	1	0	0	0	0	0	7gg-	3350	1250	1680	0.744047619	68	133	0.6	0.54	NA	1_AA	0_noventilazione	2
203	male	38	0	0	0	11	11	1	0	0	0	0	0	0	0	0	0	0	0	1	1	0	1	1	0	1_notoci_nocortisone	0	0	1	1	0	0	0	8gg+	4550	2320	1700	1.364705882	NA	387	NA	1.92	452	1_AA	0_noventilazione	2
204	male	60	1	1	1	11	18	0	0	0	0	0	0	0	0	0	0	0	0	0	1	0	1	1	1	4_toci_cortisone	0	1	1	0	0	0	0	7gg-	5710	3710	1350	2.748148148	NA	249	NA	2.07	338	1_AA	1_venturi	3
205	male	35	0	0	0	2	2	0	0	0	0	0	0	0	0	0	0	0	0	0	0	0	1	1	0	1_notoci_nocortisone	0	1	1	0	0	0	0	7gg-	5210	2870	1.68	1708.333333	167	NA	4.473	0.05	433	1_AA	0_noventilazione	1
206	male	43	0	0	0	29	29	0	1	0	0	0	0	0	0	0	0	0	1	1	1	0	1	1	1	2_notoci_cortisone	0	1	1	0	1	0	0	7gg-	6270	4570	1220	3.745901639	NA	244	NA	5.18	366	1_AA	0_noventilazione	2
207	male	71	0	0	0	25	25	0	0	0	0	0	0	0	0	0	0	0	0	0	1	0	1	1	1	4_toci_cortisone	0	1	0	0	1	1	0	7gg-	4470	3340	720	4.638888889	364	285	0.88	2.3	384	1_AA	1_venturi	3
208	male	80	0	0	0	5	5	1	1	0	0	0	0	0	0	0	0	0	NA	2	1	0	NA	NA	1	2_notoci_cortisone	0	0	0	0	1	0	0	7gg-	7640	3460	3330	1.039039039	246	220	1.5	1.17	466	1_AA	0_noventilazione	2
209	female	82	0	0	0	23	23	1	0	0	0	0	0	0	0	0	0	0	0	1	1	0	0	1	1	4_toci_cortisone	0	1	0	0	0	0	0	7gg-	6340	4400	1290	3.410852713	86	197	0.98	0.53	431	1_AA	1_venturi	3
210	female	83	0	0	0	29	29	0	0	0	0	1	0	0	0	1	0	0	2	2	1	0	1	1	1	2_notoci_cortisone	0	1	0	0	0	0	0	7gg-	12360	11300	760	14.86842105	NA	NA	4.473	22.73	336	1_AA	1_venturi	3
212	male	63	0	0	0	38	38	1	0	0	0	0	0	1	0	0	0	0	1	2	1	0	1	1	1	4_toci_cortisone	0	1	1	0	1	0	0	7gg-	6580	5000	1200	4.166666667	1213	256	0.9	5.82	217	1_AA	1_venturi	3
213	female	88	0	NA	1	29	29	1	0	0	0	0	0	0	0	1	0	0	1	2	1	0	0	1	1	1_notoci_nocortisone	NA	NA	0	NA	NA	NA	0	NA	4330	2190	1820	1.203296703	269	247	1.38	0.63	364	1_AA	0_noventilazione	3
214	male	97	0	NA	1	16	16	1	0	0	0	1	0	0	0	1	0	0	2	3	1	0	1	1	1	2_notoci_cortisone	0	0	1	0	0	0	0	7gg-	5350	4070	960	4.239583333	NA	550	NA	20.92	428	1_AA	0_noventilazione	3
215	male	65	0	0	0	6	6	0	0	0	0	1	0	0	0	0	0	0	2	1	0	0	0	1	1	1_notoci_nocortisone	0	0	0	0	0	0	0	NA	9580	7220	1250	5.776	NA	185	0.64	0.18	400	1_AA	0_noventilazione	2
216	female	97	0	0	0	59	59	1	0	0	0	0	0	0	0	1	0	0	2	2	1	0	0	1	1	2_notoci_cortisone	0	0	0	0	0	0	0	NA	4740	2160	2020	1.069306931	159	186	2.28	1.18	339	1_AA	0_noventilazione	2
217	male	33	0	0	0	19	19	0	0	0	0	0	0	0	0	0	0	0	0	0	1	0	0	1	1	3_toci_nocortisone	0	1	1	0	0	1	0	7gg-	7320	3540	2560	1.3828125	273	154	0.86	1	396	1_AA	0_noventilazione	2
218	male	74	0	0	0	19	19	1	0	0	0	0	0	0	0	0	0	0	0	1	1	0	1	1	1	4_toci_cortisone	0	1	1	0	0	0	0	8gg+	7660	7130	340	20.97058824	958	297	NA	4.62	172	2_VM	1_venturi	3
219	male	77	0	0	0	9	9	1	0	0	0	0	0	0	0	0	0	0	0	1	1	0	0	1	1	1_notoci_nocortisone	0	1	1	0	0	0	0	8gg+	4960	2310	1780	1.297752809	NA	NA	2.94	1.22	322	1_AA	0_noventilazione	2
220	male	47	0	0	0	4	4	0	0	0	0	0	0	0	0	0	0	0	0	0	0	0	0	0	1	1_notoci_nocortisone	0	0	0	0	0	1	0	8gg+	5810	3810	1440	2.645833333	130	158	0.46	0.11	457	1_AA	0_noventilazione	1
221	female	91	0	0	0	24	24	0	0	0	0	0	0	0	0	1	0	0	2	1	1	0	1	1	1	1_notoci_nocortisone	0	0	0	0	1	0	0	7gg-	16720	11000	3260	3.374233129	NA	207	1.56	2.13	460	1_AA	1_venturi	2
222	male	83	0	0	0	53	53	1	0	0	0	1	0	0	0	0	0	0	3	2	0	0	0	1	1	3_toci_nocortisone	0	1	0	0	0	1	0	7gg-	6460	4840	1140	4.245614035	223	269	2.94	15.36	300	1_AA	1_venturi	3
223	female	51	0	0	0	41	41	0	0	0	0	1	0	0	0	0	0	0	4	1	1	0	1	1	1	4_toci_cortisone	0	1	1	0	0	0	0	7gg-	5860	5290	470	11.25531915	264	278	2.98	10.43	261	1_AA	1_venturi	3
224	male	81	0	0	0	31	31	0	0	0	0	0	0	0	0	0	0	0	0	0	1	0	1	1	0	4_toci_cortisone	0	1	0	0	1	1	0	7gg-	23700	19830	2690	7.371747212	NA	NA	4.473	19.94	201	3_CPAP	1_venturi	3
225	male	69	0	NA	1	23	23	1	0	0	0	0	0	0	0	0	0	0	1	1	1	0	0	1	1	1_notoci_nocortisone	0	0	0	0	0	0	0	NA	3620	2280	1010	2.257425743	313	144	1.7	2.81	404	1_AA	0_noventilazione	2
226	female	80	0	0	0	33	33	1	0	0	0	0	0	0	0	0	0	0	0	1	0	0	0	0	1	3_toci_nocortisone	0	1	1	0	1	1	0	7gg-	4090	2190	1500	1.46	NA	314	NA	5.99	267	2_VM	1_venturi	3
227	male	66	0	0	0	17	17	1	1	0	0	0	0	1	0	0	0	0	2	3	1	0	1	1	1	1_notoci_nocortisone	0	1	1	0	0	0	0	7gg-	3820	1930	1290	1.496124031	NA	233	NA	0.94	357	1_AA	0_noventilazione	2
228	female	48	0	0	0	5	5	0	0	0	0	0	0	0	0	0	0	0	0	0	0	0	0	1	0	1_notoci_nocortisone	0	1	0	0	0	0	0	7gg-	5370	2750	1730	1.589595376	57	192	0.4	0.17	362	1_AA	0_noventilazione	1
229	male	73	0	0	0	58	58	1	0	0	0	0	0	0	0	0	1	0	0	2	1	0	1	1	1	4_toci_cortisone	0	1	1	0	1	0	0	7gg-	12390	11180	500	22.36	NA	NA	4.473	0.74	186	3_CPAP	1_venturi	3
230	male	57	0	0	0	60	60	0	0	0	1	0	0	0	0	0	0	0	3	1	1	0	1	0	1	4_toci_cortisone	0	0	0	0	0	0	0	NA	3850	1970	940	2.095744681	99	220	NA	0.61	460	1_AA	1_venturi	3
231	female	80	0	0	0	19	19	1	0	0	0	0	0	0	1	0	0	0	0	2	1	1	0	0	1	2_notoci_cortisone	0	1	0	1	0	0	0	7gg-	7100	5060	1450	3.489655172	596	254	NA	3.36	385	1_AA	1_venturi	2
232	female	72	0	0	0	29	29	1	0	0	0	0	0	0	0	0	1	0	1	2	1	0	1	1	1	4_toci_cortisone	0	1	1	0	0	0	0	8gg+	4680	2970	980	3.030612245	NA	267	NA	NA	282	2_VM	1_venturi	3
233	male	64	0	0	0	13	13	0	0	0	1	0	0	0	0	0	0	0	2	1	1	0	1	1	0	1_notoci_nocortisone	0	1	0	0	1	1	0	7gg-	8860	6580	1510	4.357615894	NA	329	NA	3.14	352	1_AA	0_noventilazione	2
234	female	65	0	0	0	11	11	1	0	0	0	0	0	0	0	0	0	0	2	1	1	0	1	1	1	1_notoci_nocortisone	0	1	0	0	1	0	0	8gg+	6810	5370	910	5.901098901	NA	265	4.473	4.62	428	1_AA	0_noventilazione	2
235	female	58	0	0	0	13	13	1	0	0	0	0	1	0	0	0	0	0	1	2	1	0	1	1	1	4_toci_cortisone	NA	NA	0	NA	NA	NA	0	NA	6890	5740	810	7.086419753	242	428	NA	NA	262	3_CPAP	0_noventilazione	3
236	female	24	0	0	0	14	14	0	0	0	0	0	1	0	0	0	0	0	0	1	1	0	1	1	0	1_notoci_nocortisone	0	1	1	1	0	0	0	7gg-	4030	2240	1300	1.723076923	133	203	3.94	1.37	360	2_VM	1_venturi	3
237	male	52	0	0	0	3	3	1	0	0	0	0	0	0	0	0	0	0	0	1	1	0	0	1	1	2_notoci_cortisone	0	0	0	0	1	0	0	7gg-	9410	6070	2680	2.264925373	NA	197	0.44	0.24	300	2_VM	1_venturi	2
238	female	59	0	0	0	24	24	0	0	0	1	1	0	0	0	0	1	0	3	3	1	0	1	1	1	4_toci_cortisone	0	1	1	0	0	0	0	8gg+	4200	2410	1320	1.825757576	NA	304	NA	3	337	1_AA	1_venturi	3
239	male	81	0	0	0	46	46	1	0	1	0	0	0	0	0	0	0	0	1	2	1	0	1	1	1	4_toci_cortisone	0	1	1	0	1	0	0	8gg+	6900	6360	350	18.17142857	568	568	2.18	27.36	119	2_VM	1_venturi	3
240	male	68	0	0	0	21	21	0	0	0	0	0	0	0	0	0	0	0	1	0	1	1	0	0	1	1_notoci_nocortisone	0	1	0	0	0	1	0	7gg-	5050	2220	2370	0.936708861	477	158	0.62	0.4	314	1_AA	0_noventilazione	2
241	female	61	0	0	0	38	38	0	0	0	0	0	0	0	0	0	0	0	0	0	1	0	0	1	1	2_notoci_cortisone	0	1	1	0	0	0	0	NA	5180	2640	1950	1.353846154	258	214	0.92	3.26	496	1_AA	0_noventilazione	2
242	male	51	0	0	0	10	10	0	0	0	0	0	0	0	0	0	0	0	0	0	1	0	1	1	0	1_notoci_nocortisone	0	1	0	0	0	1	0	7gg-	3290	1470	1280	1.1484375	NA	221	NA	0.48	390	1_AA	0_noventilazione	2
243	female	81	0	0	0	61	61	1	0	0	0	0	0	0	0	0	0	0	0	1	1	0	1	1	1	4_toci_cortisone	0	1	0	0	1	1	0	7gg-	4020	3020	650	4.646153846	NA	309	NA	3.24	140	3_CPAP	1_venturi	3
244	male	62	0	0	0	10	10	0	0	0	0	0	0	0	0	0	0	0	0	0	1	0	0	1	1	1_notoci_nocortisone	0	0	0	0	0	0	0	NA	6560	4250	1500	2.833333333	50	155	0.6	0.23	469	1_AA	0_noventilazione	2
245	female	72	0	0	0	36	36	1	0	0	0	1	0	0	0	0	0	0	1	2	1	0	1	1	NA	4_toci_cortisone	0	1	0	0	1	0	0	7gg-	6930	NA	800	NA	NA	279	3.32	14.31	173	1_AA	1_venturi	3
246	male	30	0	0	0	38	38	0	0	0	0	0	0	0	0	0	0	0	0	0	1	0	0	1	1	4_toci_cortisone	0	1	1	0	1	0	0	7gg-	1720	830	530	1.566037736	6138	947	1.12	5.38	247	2_VM	1_venturi	3
247	male	35	0	0	0	25	25	0	0	0	0	0	0	0	0	0	0	0	0	0	1	0	1	1	1	4_toci_cortisone	0	1	0	0	0	1	0	7gg-	5150	3000	1200	2.5	597	182	NA	0.9	366	1_AA	1_venturi	3
248	male	74	0	0	0	9	9	1	0	0	1	1	0	0	0	0	0	0	4	3	0	0	1	0	1	1_notoci_nocortisone	0	0	0	0	0	0	0	NA	7470	4790	1540	3.11038961	545	171	1.96	0.21	462	1_AA	0_noventilazione	1
249	female	83	0	0	0	56	56	1	0	0	1	0	0	0	0	0	0	0	2	2	1	0	1	0	1	2_notoci_cortisone	0	0	0	0	0	0	0	NA	6210	3990	810	4.925925926	NA	195	1.04	0.12	395	1_AA	1_venturi	2
250	female	93	0	0	0	2	2	1	1	0	1	0	0	0	0	0	0	0	3	3	0	0	0	0	1	1_notoci_nocortisone	0	0	0	0	0	0	0	NA	NA	NA	NA	NA	NA	NA	NA	NA	400	1_AA	0_noventilazione	1
251	female	94	0	1	1	18	18	0	0	0	0	1	0	1	0	1	0	0	2	3	1	0	0	1	1	4_toci_cortisone	0	0	0	0	0	0	0	NA	9550	8520	560	15.21428571	1289	NA	NA	9.52	265	2_VM	1_venturi	3
252	female	63	0	0	0	22	22	1	0	0	0	0	0	0	0	0	0	0	0	1	1	0	1	1	0	4_toci_cortisone	0	1	0	0	0	0	0	8gg+	5130	4070	640	6.359375	NA	331	NA	4.62	464	1_AA	1_venturi	3
253	male	33	0	0	0	9	9	0	0	1	0	0	0	0	0	0	0	0	6	1	0	0	NA	1	0	1_notoci_nocortisone	0	1	0	0	1	0	0	8gg+	4380	1610	1890	0.851851852	726	160	NA	0.88	466	1_AA	0_noventilazione	2
254	male	38	0	0	0	29	29	0	0	0	0	0	0	0	0	0	0	0	0	0	1	0	1	1	0	4_toci_cortisone	0	1	1	0	1	0	0	7gg-	12280	10590	990	10.6969697	NA	255	NA	1.71	347	1_AA	1_venturi	3
255	male	63	0	0	0	25	25	0	0	0	0	0	0	0	0	0	0	0	0	0	1	0	1	1	0	4_toci_cortisone	0	1	1	0	0	0	0	7gg-	7780	6070	1380	4.398550725	3089	473	0.92	16.37	323	1_AA	1_venturi	3
256	female	53	0	0	0	35	35	0	1	0	0	0	0	0	0	0	0	0	1	1	1	0	1	1	1	4_toci_cortisone	NA	NA	0	NA	NA	NA	0	NA	4090	2490	1230	2.024390244	NA	158	NA	0.34	320	1_AA	1_venturi	3
257	male	67	0	0	0	19	19	0	0	0	1	0	0	0	0	0	0	0	2	1	1	0	1	1	0	2_notoci_cortisone	NA	NA	0	NA	NA	NA	0	NA	6960	5610	1040	5.394230769	NA	308	3.04	6.21	400	1_AA	0_noventilazione	2
258	male	66	0	0	0	13	13	1	0	0	0	0	0	0	0	0	0	0	0	1	1	0	1	1	0	2_notoci_cortisone	0	1	1	0	0	0	0	7gg-	5640	3640	1610	2.260869565	NA	368	NA	8.13	285	1_AA	1_venturi	3
259	female	78	1	1	1	9	13	1	0	0	0	0	0	0	1	0	0	0	0	2	1	1	1	1	1	4_toci_cortisone	0	1	0	0	0	0	0	7gg-	6520	5050	860	5.872093023	NA	224	1.98	3.06	280	2_VM	1_venturi	3
260	male	80	0	0	0	15	15	1	0	0	0	1	0	1	0	0	0	0	1	3	1	0	1	1	0	1_notoci_nocortisone	0	0	1	0	0	0	0	7gg-	7550	3970	2820	1.407801418	NA	181	NA	0.04	404	1_AA	0_noventilazione	2
261	female	47	0	0	0	11	11	0	0	0	0	0	0	0	0	0	0	0	0	0	1	0	1	1	1	1_notoci_nocortisone	NA	NA	0	NA	NA	NA	0	NA	3380	2240	870	2.574712644	NA	137	NA	0.36	320	1_AA	0_noventilazione	2
262	female	59	0	0	0	19	19	0	0	0	0	0	0	0	0	0	0	0	0	0	1	0	1	1	0	1_notoci_nocortisone	0	1	1	0	0	1	0	7gg-	2750	1420	1020	1.392156863	NA	281	NA	1.01	420	1_AA	0_noventilazione	2
263	female	73	0	NA	1	10	10	0	0	0	0	0	0	0	0	0	0	1	2	1	1	0	0	1	1	1_notoci_nocortisone	0	NA	0	NA	NA	NA	0	NA	4570	1690	2290	0.737991266	163	229	0.68	0.19	356	1_AA	0_noventilazione	2
264	female	49	0	0	0	36	36	0	0	0	0	0	0	0	0	0	0	0	0	0	1	0	1	1	1	4_toci_cortisone	0	1	1	0	1	0	0	8gg+	3220	2110	950	2.221052632	NA	314	NA	6.29	161	1_AA	1_venturi	3
265	female	58	0	0	0	14	14	1	1	0	0	1	0	0	1	0	0	0	3	4	1	0	1	1	1	2_notoci_cortisone	0	1	0	0	1	0	0	8gg+	4470	3650	480	7.604166667	179	376	NA	7.64	338	1_AA	1_venturi	2
266	male	68	0	0	0	37	37	1	0	0	0	1	0	0	0	0	0	0	1	2	1	0	1	1	0	4_toci_cortisone	0	1	1	0	0	1	0	7gg-	6790	4330	1660	2.608433735	394	209	0.62	3.22	356	1_AA	1_venturi	3
268	female	82	0	0	0	19	19	0	0	0	0	0	0	1	0	0	0	0	2	1	1	0	0	1	1	1_notoci_nocortisone	0	0	0	0	0	0	0	NA	7120	5120	1570	3.261146497	NA	NA	0.38	0.04	443	1_AA	0_noventilazione	2
269	male	57	1	1	1	3	35	0	0	0	0	0	0	0	1	0	0	0	0	1	1	0	1	1	1	4_toci_cortisone	0	1	1	0	0	0	0	8gg+	7310	5390	1410	3.822695035	600	386	2.02	4.66	226	2_VM	1_venturi	3
271	male	65	0	0	0	11	11	1	0	0	0	1	0	0	0	0	0	0	1	2	0	0	0	0	0	1_notoci_nocortisone	0	0	0	0	0	0	0	NA	8460	5840	1760	3.318181818	NA	245	NA	0.78	457	1_AA	0_noventilazione	1
272	male	54	1	1	1	1	12	0	0	0	0	0	0	0	0	0	0	0	0	0	1	0	1	1	1	4_toci_cortisone	0	1	1	0	1	0	0	7gg-	6270	5490	510	10.76470588	NA	355	NA	22.96	310	1_AA	2_casco	3
273	male	55	0	0	0	15	15	1	0	0	0	0	0	1	0	0	0	0	0	2	1	0	1	1	0	2_notoci_cortisone	0	1	1	0	0	0	0	8gg+	4930	3350	1170	2.863247863	NA	657	NA	9.41	398	1_AA	0_noventilazione	2
274	female	68	0	0	0	21	21	1	1	1	0	0	0	0	0	0	0	1	7	4	1	0	0	0	1	4_toci_cortisone	0	1	0	0	1	0	0	7gg-	4060	2960	650	4.553846154	19	274	NA	0.16	318	1_AA	1_venturi	2
275	male	43	0	0	0	49	49	0	0	0	0	0	0	0	0	0	0	0	0	0	1	0	1	1	1	4_toci_cortisone	0	1	1	0	0	0	0	7gg-	3650	2670	640	4.171875	NA	295	NA	NA	304	1_AA	1_venturi	3
276	female	93	0	0	0	10	10	0	0	0	0	0	0	0	0	0	0	0	1	0	1	0	0	1	1	1_notoci_nocortisone	0	0	0	1	0	0	0	8gg+	9590	6790	1960	3.464285714	NA	190	NA	1.16	378	1_AA	0_noventilazione	3
277	female	54	0	0	0	30	30	0	0	0	0	0	0	0	0	0	0	1	0	1	1	0	1	1	1	4_toci_cortisone	0	1	1	0	0	0	0	8gg+	2990	2220	680	3.264705882	422	263	NA	2.79	376	2_VM	1_venturi	3
278	male	50	0	0	0	7	7	0	0	0	0	0	1	0	0	0	0	0	1	1	1	0	1	1	0	1_notoci_nocortisone	0	1	1	0	0	0	0	8gg+	8090	5840	1400	4.171428571	181	NA	0.76	1.95	381	1_AA	0_noventilazione	2
279	male	83	0	0	0	5	5	0	0	0	0	0	0	0	0	0	0	0	1	0	1	0	0	1	1	1_notoci_nocortisone	0	1	0	0	0	0	0	8gg+	6450	4620	1290	3.581395349	198	119	NA	0.06	336	1_AA	0_noventilazione	1
280	male	52	0	0	0	30	30	0	0	0	0	0	0	0	0	0	0	1	0	1	1	0	1	1	1	4_toci_cortisone	0	1	1	0	1	0	0	7gg-	5490	3060	1780	1.719101124	NA	290	1.04	0.18	354	1_AA	1_venturi	3
282	female	51	0	0	0	13	13	1	1	0	0	0	0	0	0	0	0	0	1	2	1	0	0	1	1	3_toci_nocortisone	0	1	0	0	0	1	0	8gg+	3790	1960	1040	1.884615385	5	132	2.02	2	442	1_AA	0_noventilazione	2
283	male	46	0	0	0	21	21	0	0	0	0	0	0	0	0	0	0	0	0	0	1	0	1	1	1	4_toci_cortisone	0	1	1	0	0	0	0	8gg+	3060	1740	960	1.8125	3081	473	1.98	3	291	1_AA	1_venturi	3
284	female	88	0	0	0	15	15	1	1	0	1	0	0	0	0	0	1	0	4	4	0	0	0	1	1	1_notoci_nocortisone	0	0	0	0	1	1	0	7gg-	9640	6190	2080	2.975961538	NA	286	NA	0.98	521	1_AA	0_noventilazione	2
285	male	63	0	0	0	35	35	1	0	0	0	0	0	0	0	0	0	0	0	1	1	0	1	1	1	4_toci_cortisone	0	1	1	0	0	0	0	8gg+	42440	39140	2160	18.12037037	NA	278	NA	NA	230	1_AA	1_venturi	3
286	male	56	0	0	0	53	53	1	0	0	0	1	0	1	0	0	0	0	2	3	1	1	0	0	1	4_toci_cortisone	0	0	1	0	0	0	0	7gg-	4030	2350	770	3.051948052	122	205	3.74	0.33	409	1_AA	1_venturi	3
287	male	67	0	0	0	28	28	1	0	0	0	0	0	0	0	0	0	0	0	1	1	0	1	1	1	4_toci_cortisone	0	1	1	0	1	0	0	8gg+	8740	7280	880	8.272727273	NA	305	NA	12.61	305	2_VM	1_venturi	3
288	female	69	0	0	0	11	11	1	0	0	0	0	0	0	0	0	0	0	1	1	1	0	1	1	0	1_notoci_nocortisone	0	1	1	1	1	1	0	8gg+	6900	4770	1380	3.456521739	NA	274	NA	6.84	327	1_AA	1_venturi	2
289	male	75	0	0	0	13	13	1	0	0	0	0	0	0	0	1	0	0	1	2	1	0	1	1	0	2_notoci_cortisone	0	0	1	0	0	0	0	8gg+	5900	3400	1520	2.236842105	132	256	1.28	2.8	371	1_AA	0_noventilazione	2
291	male	68	0	0	0	40	40	1	0	1	1	1	0	0	0	0	0	0	4	4	1	0	1	0	1	4_toci_cortisone	0	0	0	0	0	0	0	NA	3660	1970	1080	1.824074074	196	NA	1.26	0.26	273	2_VM	1_venturi	3
292	female	49	0	0	0	11	11	0	0	0	0	0	1	0	0	0	0	0	0	1	1	0	0	1	0	3_toci_nocortisone	0	1	1	1	0	0	1	7gg-	4120	1860	1700	1.094117647	254	197	457	0.26	462	1_AA	0_noventilazione	2
293	male	51	0	0	0	22	22	0	0	0	0	0	0	0	0	0	0	0	1	0	1	0	0	1	1	4_toci_cortisone	0	1	0	0	1	1	0	7gg-	13400	11120	1210	9.190082645	722	291	627	3.78	305	3_CPAP	2_casco	3
294	female	34	0	0	0	4	4	0	0	0	0	0	0	0	0	0	0	0	0	0	0	0	0	0	0	1_notoci_nocortisone	0	0	0	0	0	0	1	8gg+	10210	7520	1840	4.086956522	64	148	1.001	NA	NA	1_AA	0_noventilazione	1
295	male	39	0	0	0	19	19	1	0	0	0	0	0	0	0	0	0	0	0	1	1	0	0	0	1	4_toci_cortisone	0	1	0	0	0	0	0	8gg+	5330	3140	1610	1.950310559	727	310	437	2.62	324	1_AA	0_noventilazione	3
296	male	42	0	0	0	29	29	0	0	0	0	0	0	0	0	0	0	0	0	0	1	0	0	0	1	2_notoci_cortisone	NA	NA	0	NA	NA	NA	0	NA	11840	8410	2530	3.324110672	291	257	302	3.23	NA	NA	0_noventilazione	2
297	female	44	0	0	0	8	8	0	0	0	0	0	0	0	0	1	0	0	1	1	0	0	0	0	0	1_notoci_nocortisone	0	0	0	0	0	0	0	NA	7300	4010	2410	1.663900415	121	171	NA	0.09	395	1_AA	0_noventilazione	2
298	male	79	0	0	0	27	27	1	1	0	0	0	0	0	0	0	0	0	6	2	0	0	0	0	1	1_notoci_nocortisone	0	0	1	0	1	0	0	8gg+	6030	4340	1650	2.63030303	395	326	2.604	4.83	357	1_AA	0_noventilazione	2
299	male	74	0	0	0	21	21	1	0	0	0	1	0	0	0	0	0	0	5	2	1	0	0	1	1	1_notoci_nocortisone	0	1	1	0	1	0	0	7gg-	9420	4030	660	6.106060606	1306	309	522	29.19	300	1_AA	1_venturi	2
300	male	37	0	0	0	6	6	1	0	0	0	0	0	0	0	0	0	0	0	1	0	0	0	1	0	1_notoci_nocortisone	0	1	1	0	0	0	0	8gg+	4900	2930	1360	2.154411765	74	214	224	0.93	NA	1_AA	0_noventilazione	2
301	male	70	0	0	0	31	31	1	0	0	0	0	0	0	0	0	0	0	3	1	1	0	0	1	1	3_toci_nocortisone	0	0	1	0	0	0	0	NA	7000	5730	690	8.304347826	1514	391	1.274	8.5	295	1_AA	2_casco	3
302	female	86	0	0	0	19	19	1	0	0	0	0	0	0	0	0	0	0	4	1	1	0	0	0	1	1_notoci_nocortisone	0	0	0	0	0	0	0	NA	7410	4990	1830	2.726775956	150	130	1.775	NA	410	1_AA	0_noventilazione	1
303	male	75	1	0	1	1	57	0	0	0	0	0	0	0	0	0	0	0	3	0	1	0	0	1	1	3_toci_nocortisone	0	1	0	0	1	0	0	7gg-	3570	3120	310	10.06451613	3009	301	848	20.21	NA	1_AA	2_casco	3
304	female	82	0	0	0	9	9	1	0	0	0	0	0	0	0	0	0	0	4	1	1	0	1	1	0	2_notoci_cortisone	0	0	0	0	0	1	0	7gg-	3200	2050	730	2.808219178	NA	236	605	3.14	188	1_AA	1_venturi	2
305	female	71	0	0	0	11	11	1	0	0	0	0	0	0	0	0	0	0	3	1	0	0	0	0	0	1_notoci_nocortisone	0	1	0	1	1	1	0	8gg+	7500	5760	990	5.818181818	302	166	643	0.18	410	1_AA	0_noventilazione	1
306	male	65	0	0	0	15	15	0	0	0	1	0	0	0	0	0	0	1	5	2	1	0	0	1	1	1_notoci_nocortisone	0	0	0	0	0	0	0	NA	3400	2170	620	3.5	NA	NA	1.818	2.87	366	1_AA	0_noventilazione	2
307	male	37	0	0	0	11	11	0	0	0	0	0	0	0	0	0	0	0	0	0	0	0	1	1	0	1_notoci_nocortisone	0	1	1	0	0	0	0	7gg-	3300	1848	1000	1.848	906	308	406	0.49	533	NA	1_venturi	2
308	male	90	0	0	0	49	49	0	0	0	0	1	0	0	0	0	0	0	6	1	0	0	0	1	1	1_notoci_nocortisone	0	1	1	0	1	0	0	8gg+	NA	NA	NA	NA	NA	NA	NA	5.53	198	NA	0_noventilazione	3
309	female	71	0	0	0	12	12	1	0	0	0	0	0	0	0	1	0	0	3	2	1	0	0	0	1	1_notoci_nocortisone	0	1	0	0	0	1	0	7gg-	200	90	70	1.285714286	1785	153	1.506	13.66	419	1_AA	0_noventilazione	1
310	female	28	0	0	0	22	22	0	0	0	0	0	0	0	0	0	0	0	0	0	1	0	0	1	1	2_notoci_cortisone	0	1	0	0	0	0	0	7gg-	5860	4210	930	4.52688172	NA	300	NA	0.12	433	1_AA	0_noventilazione	2
311	female	44	0	0	0	12	12	0	0	0	0	0	0	0	0	0	0	0	0	0	0	0	0	1	0	1_notoci_nocortisone	0	1	0	0	1	1	0	8gg+	4850	NA	1800	NA	113	115	178	0.15	581	1_AA	0_noventilazione	2
312	male	55	1	0	1	2	36	0	0	0	0	0	0	0	0	0	0	0	1	0	1	0	0	1	1	4_toci_cortisone	0	1	0	1	0	0	0	7gg-	4730	3490	880	3.965909091	2709	444	4.473	20.8	219	NA	1_venturi	3
313	female	52	0	0	0	12	12	0	0	0	0	0	0	0	0	0	0	0	1	0	0	0	1	1	0	1_notoci_nocortisone	0	1	1	0	0	0	0	7gg-	3900	2750	740	3.716216216	543	311	905	0.21	322	1_AA	1_venturi	2
314	female	61	0	0	0	15	15	1	1	0	0	1	0	0	0	0	0	0	4	3	1	0	0	1	0	1_notoci_nocortisone	0	1	1	0	0	0	0	7gg-	3130	2472.7	330	7.493030303	192	414	NA	10.49	338	1_AA	0_noventilazione	2
316	female	57	0	0	0	3	3	0	0	0	0	0	0	0	0	0	0	0	1	0	0	0	0	0	0	3_toci_nocortisone	0	1	0	0	0	0	0	8gg+	4450	2240	1600	1.4	NA	153	NA	0.62	390	1_AA	0_noventilazione	2
317	male	35	0	0	0	20	20	0	0	0	0	0	1	0	0	0	0	0	0	1	1	0	0	1	1	3_toci_nocortisone	0	1	1	0	0	0	0	7gg-	7480	4550	2270	2.004405286	585	243	942	1.4	NA	NA	1_venturi	3
318	male	23	0	0	0	8	8	0	0	0	0	0	0	0	0	0	0	0	0	0	1	0	0	1	0	1_notoci_nocortisone	0	1	1	0	0	0	0	8gg+	5530	3460	1390	2.489208633	NA	NA	0.42	3.35	480	1_AA	0_noventilazione	2
319	male	83	0	0	0	32	32	0	0	0	0	1	0	0	0	0	0	0	5	1	1	0	0	1	1	4_toci_cortisone	0	1	0	0	0	0	0	8gg+	4390	3210	630	5.095238095	2881	239	1.912	2.46	343	1_AA	1_venturi	2
320	male	60	0	0	0	6	6	0	0	0	0	1	0	0	0	0	0	0	3	1	1	0	1	1	0	1_notoci_nocortisone	0	0	1	1	0	0	0	7gg-	7070	5380	930	5.784946237	NA	573	NA	5.07	348	NA	1_venturi	2
321	male	66	0	0	0	79	79	1	1	0	0	0	0	0	0	0	0	0	3	2	0	0	0	0	1	1_notoci_nocortisone	0	0	0	0	0	0	0	NA	14640	8780	4160	2.110576923	179	165	1.233	11.24	NA	NA	2_casco	3
322	male	81	0	0	0	7	7	0	0	0	0	0	0	0	0	0	0	0	4	0	0	0	0	1	1	1_notoci_nocortisone	0	1	0	0	0	0	0	7gg-	5600	3580	1070	3.345794393	530	258	1.089	1.17	438	1_AA	0_noventilazione	2
323	male	81	0	0	0	37	37	0	0	0	0	0	0	1	0	1	0	1	6	3	1	0	1	1	1	1_notoci_nocortisone	0	0	1	0	0	0	0	7gg-	4770	3650	800	4.5625	NA	193	1.4	1.39	390	1_AA	1_venturi	2
324	female	54	0	0	0	12	12	1	0	0	0	0	0	0	0	0	0	0	1	1	1	0	0	1	1	1_notoci_nocortisone	0	0	1	0	0	0	0	7gg-	5600	3400	1400	2.428571429	135	306	413	2.01	518	1_AA	0_noventilazione	2
327	male	76	0	0	0	38	38	1	1	0	0	0	0	0	0	0	0	0	5	2	1	0	0	1	1	4_toci_cortisone	0	1	1	0	0	0	0	8gg+	3100	1930	950	2.031578947	1190	165	1.646	4.06	314	1_AA	2_casco	3
328	male	47	0	0	0	19	19	1	0	0	0	1	0	1	1	0	0	0	1	4	1	0	1	1	1	4_toci_cortisone	0	1	0	0	0	0	0	8gg+	6700	5190	1230	4.219512195	NA	566	4.61	0.2	150	1_AA	2_casco	3
330	male	70	0	0	0	11	11	0	0	0	0	0	0	0	0	0	0	0	3	0	1	0	0	1	0	3_toci_nocortisone	0	1	0	1	1	0	0	7gg-	4700	3080	1140	2.701754386	1088	450	1.002	7.3	343	1_AA	1_venturi	2
331	male	70	1	1	1	3	15	0	0	1	0	0	0	0	0	0	0	0	5	1	0	0	0	1	0	3_toci_nocortisone	NA	NA	0	NA	NA	NA	0	7gg-	2900	2056.1	280	7.343214286	417	344	815	NA	NA	NA	0_noventilazione	3
332	female	44	0	0	0	11	11	0	0	0	0	0	0	0	0	0	0	1	NA	1	0	0	1	1	0	1_notoci_nocortisone	0	1	1	0	0	0	1	8gg+	5500	2800	1900	1.473684211	NA	207	538	0.7	348	1_AA	0_noventilazione	2
333	male	68	0	0	0	26	26	1	1	0	0	1	0	0	0	0	0	0	5	3	1	0	0	0	1	1_notoci_nocortisone	0	0	0	0	1	0	0	7gg-	11100	9450	800	11.8125	2250	220	2.031	14.1	293	3_CPAP	2_casco	3
334	female	90	0	0	0	27	27	1	0	0	1	1	0	1	0	0	0	0	7	4	0	0	0	0	1	1_notoci_nocortisone	0	1	0	0	1	0	0	8gg+	11470	8010	2500	3.204	294	252	748	0.86	524	1_AA	0_noventilazione	2
335	male	46	0	0	0	7	7	0	0	0	0	0	0	0	0	0	0	0	0	0	0	0	0	1	0	1_notoci_nocortisone	0	1	1	1	0	0	0	8gg+	4300	2780	1200	2.316666667	546	175	292	2.19	486	1_AA	0_noventilazione	2
337	female	60	0	0	0	22	22	1	0	0	0	0	0	0	0	0	0	1	2	2	1	0	0	0	1	3_toci_nocortisone	0	1	0	1	0	1	0	7gg-	2400	1110	990	1.121212121	437	330	1.253	7.2	414	1_AA	1_venturi	2
338	male	86	0	0	0	27	27	0	1	0	0	0	0	0	0	1	0	1	7	3	1	0	0	0	1	1_notoci_nocortisone	0	1	0	0	0	0	0	8gg+	3080	2260	500	4.52	297	143	979	0.31	352	NA	2_casco	3
339	male	76	0	0	0	32	32	1	0	0	0	0	0	0	0	0	0	0	4	1	1	0	0	1	1	3_toci_nocortisone	0	1	0	0	0	0	0	7gg-	4500	2760	1340	2.059701493	791	170	1.328	1.76	324	NA	2_casco	3
340	male	63	0	0	0	15	15	0	0	0	0	0	0	1	0	0	0	0	2	1	1	0	0	1	0	1_notoci_nocortisone	0	1	0	0	1	1	0	7gg-	4770	3560	3560	1	498	208	443	3.44	395	1_AA	0_noventilazione	2
341	male	90	0	1	1	3	3	1	1	1	1	1	1	1	1	1	1	0	NA	10	0	0	0	0	0	1_notoci_nocortisone	0	1	0	0	1	0	0	7gg-	7780	8730	860	10.15116279	1302	439	1.547	23.68	250	NA	1_venturi	2
342	male	44	0	NA	1	7	7	0	0	1	0	0	0	0	0	0	0	0	2	1	0	0	0	0	0	1_notoci_nocortisone	0	0	0	0	0	1	0	7gg-	12200	10280	950	10.82105263	360	871	4.382	9.25	289	1_AA	0_noventilazione	2
343	female	69	0	0	0	10	10	1	0	1	0	0	0	0	0	0	0	0	4	2	1	0	0	1	1	1_notoci_nocortisone	0	1	0	1	0	1	0	8gg+	7700	3880	3200	1.2125	NA	285	1.366	0.1	334	1_AA	0_noventilazione	2
344	male	75	0	0	0	20	20	1	0	0	0	0	0	0	0	0	0	0	3	1	1	0	0	1	0	3_toci_nocortisone	0	1	0	1	0	1	0	7gg-	2320	1350	1350	1	356	204	1.203	0.7	348	1_AA	1_venturi	2
345	female	63	0	0	0	24	24	0	0	1	0	1	0	0	0	0	0	0	5	2	1	0	0	NA	0	2_notoci_cortisone	0	1	0	0	0	0	0	8gg+	7370	5710	1300	4.392307692	226	259	959	2.26	362	1_AA	1_venturi	2
346	female	62	0	0	0	15	15	0	1	0	0	0	0	0	0	0	0	0	4	1	1	0	1	1	0	1_notoci_nocortisone	0	1	1	0	0	0	0	7gg-	5800	3220	2010	1.60199005	223	171	935	0.4	256	1_AA	0_noventilazione	2
347	male	40	0	0	0	3	3	1	0	0	0	0	0	0	0	0	0	0	0	1	0	0	0	0	0	1_notoci_nocortisone	0	1	1	0	1	0	0	7gg-	4300	3448.6	560	6.158214286	NA	NA	NA	NA	NA	1_AA	0_noventilazione	2
348	female	82	0	0	0	53	53	0	1	0	0	0	0	1	0	0	0	0	5	2	0	0	0	1	0	2_notoci_cortisone	0	0	0	0	0	0	0	NA	5800	2870	2350	1.221276596	209	148	296	1.38	242	1_AA	2_casco	3
349	female	63	0	0	0	8	8	0	0	0	0	0	1	0	0	0	0	0	2	1	0	0	0	1	0	1_notoci_nocortisone	0	1	0	1	1	0	1	7gg-	7300	5520	1000	5.52	236	211	1.978	0.05	500	1_AA	0_noventilazione	2
350	female	73	0	0	0	32	32	0	1	0	0	0	0	0	0	0	0	0	5	1	1	0	0	1	1	1_notoci_nocortisone	0	1	0	NA	0	0	0	7gg-	2900	1740	810	2.148148148	529	187	813	1.27	371	1_AA	0_noventilazione	2
351	female	75	0	0	0	32	32	0	1	0	0	0	0	0	0	0	0	0	5	1	0	0	0	0	1	4_toci_cortisone	0	1	0	0	0	1	0	8gg+	9800	5550	3500	1.585714286	317	211	2.331	0.73	178	2_VM	1_venturi	2
352	male	43	0	0	0	26	26	0	0	0	0	0	0	0	0	0	0	0	0	0	1	0	0	1	1	1_notoci_nocortisone	0	1	0	0	0	0	1	8gg+	15590	12390	1760	7.039772727	320	919	0.32	1.6	NA	1_AA	0_noventilazione	2
353	female	45	0	0	0	11	11	0	0	0	0	0	0	0	0	0	0	0	0	0	0	0	0	1	0	1_notoci_nocortisone	0	1	1	0	0	1	1	8gg+	3710	2550	940	2.712765957	NA	183	375	0.1	414	1_AA	0_noventilazione	2
354	female	24	0	0	0	3	3	0	0	0	0	0	0	0	0	0	0	0	0	0	0	0	0	0	0	1_notoci_nocortisone	0	1	1	0	0	0	1	7gg-	8600	4600	2600	1.769230769	NA	220	414	0.95	510	1_AA	0_noventilazione	2
355	male	59	0	0	0	29	29	1	0	0	0	0	0	0	0	0	0	0	2	1	1	0	0	1	0	3_toci_nocortisone	0	1	1	0	0	0	0	7gg-	5700	3570	1390	2.568345324	770	438	297	3.09	443	NA	2_casco	3
356	male	84	0	0	0	15	15	1	1	0	1	1	0	0	0	1	0	0	9	5	1	0	0	0	1	1_notoci_nocortisone	0	1	0	0	1	0	0	7gg-	13610	11830	780	15.16666667	531	141	0.75	28.41	405	1_AA	0_noventilazione	2
357	male	56	0	0	0	16	16	0	0	0	0	0	0	0	0	0	0	0	1	0	1	0	0	1	1	3_toci_nocortisone	0	1	1	0	1	1	0	8gg+	5350	3130	1500	2.086666667	466	193	783	1.5	419	1_AA	1_venturi	2
358	female	87	0	0	0	29	29	1	0	0	0	0	0	0	0	0	0	0	5	1	0	0	0	0	1	2_notoci_cortisone	0	1	1	0	0	0	0	8gg+	6130	5700	270	21.11111111	NA	270	NA	0.55	310	1_AA	2_casco	3
359	female	88	0	0	0	15	15	0	1	0	0	0	0	0	0	0	0	0	6	1	1	0	0	0	1	1_notoci_nocortisone	0	0	0	0	0	0	0	8gg+	7700	6620	550	12.03636364	421	373	713	4.26	265	NA	1_venturi	3
360	female	66	0	0	0	21	21	1	0	0	0	1	0	0	0	0	0	0	3	2	0	0	0	0	1	1_notoci_nocortisone	NA	NA	0	NA	NA	NA	0	NA	5490	4060	730	5.561643836	958	134	478	NA	NA	NA	0_noventilazione	2
361	female	30	0	0	0	3	3	0	0	0	0	0	0	0	0	0	0	0	0	0	1	0	0	0	0	1_notoci_nocortisone	0	1	1	0	0	0	0	7gg-	NA	NA	NA	NA	NA	NA	NA	NA	NA	NA	0_noventilazione	1
362	female	52	0	0	0	21	21	0	0	0	0	0	0	0	0	0	0	0	1	0	1	0	0	1	1	1_notoci_nocortisone	0	1	1	0	0	1	0	7gg-	3120	1900.08	1200	1.5834	93	243	276	4.04	390	1_AA	1_venturi	2
364	male	77	0	0	0	30	30	1	0	0	0	1	0	0	0	0	0	0	5	2	1	0	1	1	1	1_notoci_nocortisone	0	1	1	0	0	0	0	7gg-	7800	5030	1620	3.104938272	NA	396	2.42	5.99	300	1_AA	1_venturi	3
365	female	52	0	0	0	17	17	0	0	0	0	0	0	0	0	0	0	1	1	1	1	0	0	1	1	1_notoci_nocortisone	0	1	1	1	0	0	0	8gg+	7210	6220	610	10.19672131	630	490	705	15.2	NA	1_AA	1_venturi	3
366	male	62	1	1	1	3	11	0	0	0	0	0	0	0	0	0	0	0	3	0	0	0	0	1	0	1_notoci_nocortisone	0	1	0	0	1	0	0	7gg-	7670	6182.02	820	7.53904878	NA	435	1.489	NA	NA	NA	0_noventilazione	3
367	female	67	0	0	0	11	11	0	0	0	0	0	0	0	0	0	0	0	2	0	0	0	0	0	0	1_notoci_nocortisone	0	1	1	0	0	0	0	7gg-	5400	3520	1400	2.514285714	NA	294	NA	1.91	376	NA	0_noventilazione	2
368	male	50	0	0	0	7	7	0	0	0	0	0	0	1	0	0	0	0	1	1	0	0	0	1	0	1_notoci_nocortisone	0	1	0	0	0	1	1	8gg+	7500	3890	2460	1.581300813	314	110	176	0.03	467	NA	0_noventilazione	2
369	male	32	0	0	0	13	13	0	0	0	0	0	0	0	0	0	0	0	0	0	1	0	0	1	1	4_toci_cortisone	0	1	0	0	0	0	1	8gg+	12280	8850	2190	4.04109589	264	152	0.33	0.3	438	1_AA	0_noventilazione	2
370	male	58	0	0	0	16	16	0	0	0	0	0	0	0	0	0	0	0	1	0	0	0	0	1	1	1_notoci_nocortisone	0	1	0	0	0	0	0	7gg-	7900	5000	2040	2.450980392	390	133	709	0.69	510	1_AA	0_noventilazione	2
371	female	36	0	0	0	11	11	0	1	0	0	0	0	0	0	0	0	0	1	1	0	0	0	0	0	1_notoci_nocortisone	0	0	0	0	1	0	0	7gg-	5900	4059.2	1600	2.537	608	145	NA	0.1	533	NA	0_noventilazione	1
372	female	62	0	0	0	4	4	1	0	0	0	0	1	1	0	0	0	0	2	3	1	0	1	1	1	3_toci_nocortisone	0	1	0	0	0	0	0	7gg-	12300	9852	1476	6.674796748	NA	246	NA	6.03	438	NA	0_noventilazione	1
373	male	81	0	0	0	33	33	1	0	0	0	0	0	0	0	0	0	0	5	1	1	0	0	1	1	4_toci_cortisone	0	1	1	0	0	0	0	8gg+	7700	6790	620	10.9516129	8000	410	786	11.99	286	3_CPAP	2_casco	3
374	male	58	0	0	0	7	7	0	0	0	0	0	0	1	0	0	0	0	1	1	0	0	0	1	0	1_notoci_nocortisone	0	1	1	0	1	0	0	8gg+	7200	5040	1600	3.15	NA	339	428	1.09	419	NA	1_venturi	2
375	male	65	0	0	0	36	36	1	0	0	0	0	0	1	0	0	0	0	2	2	1	0	0	1	1	4_toci_cortisone	0	0	0	0	0	0	0	NA	3020	2295.2	700	3.278857143	326	204	361	0.7	367	1_AA	2_casco	3
376	female	55	0	0	0	19	19	0	0	0	0	0	0	0	0	0	1	0	1	1	0	0	0	1	1	1_notoci_nocortisone	0	1	1	0	0	1	1	8gg+	4600	2170	2100	1.033333333	208	243	441	0.46	405	NA	0_noventilazione	2
377	male	77	1	0	1	11	38	0	0	0	0	0	0	0	0	0	0	0	3	0	1	0	1	1	1	3_toci_nocortisone	0	1	0	0	1	0	0	7gg-	9850	7860	1060	7.41509434	90	452	754	3.23	59	NA	0_noventilazione	3
378	female	62	0	0	0	57	57	0	1	0	0	0	0	0	0	0	0	0	3	1	1	0	0	1	1	2_notoci_cortisone	0	0	0	0	0	0	0	NA	9660	7795.62	850	9.171317647	810	203	2.212	23.35	377	NA	0_noventilazione	2
380	male	62	0	0	0	14	14	1	1	1	1	1	1	1	1	1	1	0	NA	10	1	0	0	1	0	3_toci_nocortisone	0	1	0	0	0	0	0	8gg+	5500	2580	2060	1.252427184	1772	203	2.956	1.36	582	NA	0_noventilazione	2
381	female	48	0	0	0	15	15	1	0	0	0	0	0	0	0	0	0	0	0	1	0	0	0	0	0	1_notoci_nocortisone	0	1	1	0	1	0	0	7gg-	3600	1530	1470	1.040816327	206	220	589	0.98	414	NA	0_noventilazione	2
382	male	82	0	0	0	8	8	0	1	0	1	1	0	0	0	0	0	0	9	3	1	0	0	0	1	2_notoci_cortisone	0	0	0	0	1	0	0	7gg-	10100	4270	900	4.744444444	NA	291	254	0.9	303	1_AA	2_casco	3
383	female	52	0	0	0	2	2	0	0	0	0	0	0	0	0	0	0	0	1	0	0	0	1	1	0	1_notoci_nocortisone	0	1	0	0	0	1	0	7gg-	4900	3580	770	4.649350649	227	232	NA	1.58	405	NA	0_noventilazione	2
384	male	58	0	0	0	11	11	0	0	0	0	1	0	0	0	0	0	0	3	1	0	0	0	1	0	1_notoci_nocortisone	0	0	0	0	0	0	0	NA	9900	8710	880	9.897727273	188	237	4.473	0.5	419	NA	0_noventilazione	2
385	female	57	0	0	0	14	14	1	0	0	0	0	0	0	0	0	1	0	1	2	1	0	1	1	0	1_notoci_nocortisone	0	0	0	0	0	0	0	NA	4390	3520	510	6.901960784	210	222	369	2.34	695	NA	0_noventilazione	2
386	male	71	0	0	0	6	6	1	0	0	1	1	0	0	0	0	0	0	6	3	1	0	1	1	1	1_notoci_nocortisone	0	1	0	0	1	0	0	7gg-	11080	9600	660	14.54545455	NA	NA	NA	22	NA	NA	0_noventilazione	2
387	female	91	0	1	1	9	9	1	0	0	0	1	0	1	1	0	0	0	6	4	0	0	0	1	0	1_notoci_nocortisone	0	1	0	1	1	0	0	7gg-	5130	1630	1520	1.072368421	216	257	641	4.47	300	NA	2_casco	3
388	male	51	0	0	0	27	27	1	0	0	0	0	0	0	0	0	0	0	1	1	1	0	0	0	1	3_toci_nocortisone	0	1	0	0	1	0	0	7gg-	3400	2190	730	3	1926	190	608	13.78	310	2_VM	1_venturi	3
389	male	45	0	0	0	9	9	0	0	0	0	0	0	0	0	0	0	0	0	0	0	0	0	0	0	1_notoci_nocortisone	0	1	1	0	0	0	0	8gg+	5400	3760	800	4.7	987	502	573	6.27	NA	2_VM	1_venturi	2
390	male	26	0	0	0	3	3	0	0	0	0	0	0	0	0	0	0	1	0	1	0	0	0	0	0	1_notoci_nocortisone	0	0	0	0	0	0	0	NA	9300	6330	2050	3.087804878	163	238	277	NA	NA	NA	0_noventilazione	2
391	male	74	0	0	0	21	21	0	0	0	0	0	0	0	0	0	0	0	4	0	0	0	1	1	0	1_notoci_nocortisone	0	1	1	0	0	1	0	7gg-	3980	2280	1250	1.824	169	200	808	0.53	405	1_AA	1_venturi	2
392	male	56	0	0	0	10	10	0	0	0	0	0	0	0	0	0	0	0	1	0	0	0	0	1	0	1_notoci_nocortisone	0	1	1	0	1	1	1	8gg+	6400	4590	1000	4.59	479	NA	NA	4.8	223	NA	1_venturi	2
393	male	61	0	0	0	12	12	1	0	0	0	0	0	0	0	0	0	0	3	1	1	0	0	1	0	1_notoci_nocortisone	0	1	1	1	0	1	0	7gg-	4200	2880	870	3.310344828	897	270	647	5.62	314	1_AA	1_venturi	2
394	male	91	0	1	1	10	10	0	0	0	1	0	0	0	0	0	0	0	6	1	0	0	0	0	0	2_notoci_cortisone	NA	NA	0	NA	NA	NA	0	NA	11750	8750	550	15.90909091	1804	642	4.473	30.2	124	NA	2_casco	3
395	male	46	0	0	0	13	13	0	0	0	0	0	0	0	0	0	0	0	0	0	0	0	0	0	0	1_notoci_nocortisone	0	1	1	0	0	0	0	8gg+	3900	2670	840	3.178571429	868	273	372	1.34	274	NA	0_noventilazione	2
396	female	85	0	0	0	57	57	1	0	0	0	1	0	0	0	0	0	1	7	3	1	0	1	1	1	1_notoci_nocortisone	0	1	1	0	NA	0	0	7gg-	4470	3610	550	6.563636364	236	402	999	13.56	348	NA	0_noventilazione	2
397	male	53	0	0	0	11	11	1	0	0	0	0	0	0	0	0	0	0	1	1	1	0	0	1	0	1_notoci_nocortisone	0	1	1	0	1	0	0	8gg+	3200	1550	1200	1.291666667	837	211	952	2.52	283	1_AA	1_venturi	2
398	male	69	1	1	1	5	NA	0	0	0	0	1	0	0	0	0	0	0	4	1	1	0	0	1	1	4_toci_cortisone	0	1	1	0	1	0	0	8gg+	19100	15451.9	750	20.60253333	999	516	1.949	30.89	132	NA	0_noventilazione	3
399	female	50	0	0	0	16	16	0	0	0	0	0	0	0	0	0	0	0	1	0	1	0	0	1	1	3_toci_nocortisone	0	1	0	0	0	1	0	7gg-	4800	2710	1710	1.584795322	173	271	669	3.83	NA	NA	0_noventilazione	2
400	male	87	0	0	0	2	2	1	1	0	0	0	0	0	0	0	0	0	6	2	0	0	0	0	0	3_toci_nocortisone	0	0	0	0	1	0	0	7gg-	13640	11034.76	410	26.91404878	245	436	2.944	NA	281	NA	1_venturi	2
401	female	31	0	0	0	20	20	0	0	0	0	0	0	0	0	0	0	0	0	0	0	0	0	1	1	1_notoci_nocortisone	0	1	1	0	0	1	1	7gg-	3400	1160	1730	0.670520231	188	149	1.263	2.51	433	1_AA	0_noventilazione	2
402	female	75	0	0	0	9	9	1	0	0	0	1	0	0	0	0	0	0	4	2	1	0	1	1	0	2_notoci_cortisone	0	1	0	0	1	0	0	8gg+	4710	2200	2110	1.042654028	NA	NA	NA	NA	NA	NA	1_venturi	2
403	female	58	0	0	0	6	6	0	0	0	0	0	0	0	0	0	0	0	1	0	0	0	0	1	0	1_notoci_nocortisone	0	1	0	0	0	1	0	7gg-	4600	3130	840	3.726190476	NA	156	NA	0.62	433	NA	0_noventilazione	2
405	female	57	0	0	0	11	11	0	0	0	0	0	0	1	0	0	0	0	1	1	1	0	0	1	0	1_notoci_nocortisone	0	1	1	0	1	0	0	7gg-	5800	3750	1480	2.533783784	261	244	1.009	0.38	605	NA	0_noventilazione	2
407	female	33	0	0	0	10	10	0	0	0	0	0	0	0	0	0	0	0	0	0	1	0	0	1	0	1_notoci_nocortisone	0	1	1	0	0	0	0	8gg+	3300	1290	1610	0.801242236	NA	185	492	0.15	443	NA	0_noventilazione	2
408	male	50	0	0	0	4	4	1	0	0	0	0	0	0	0	0	0	0	1	1	1	0	0	1	0	1_notoci_nocortisone	0	1	1	0	0	0	0	8gg+	4300	2020	1720	1.174418605	493	107	4.473	0.34	476	NA	0_noventilazione	2
409	female	48	1	0	1	2	53	0	0	0	0	1	1	0	0	0	0	0	1	2	1	0	0	1	1	3_toci_nocortisone	0	1	1	0	0	0	0	8gg+	NA	NA	NA	NA	NA	NA	NA	NA	NA	3_CPAP	2_casco	3
410	female	58	0	0	0	9	9	1	1	0	0	1	0	0	0	0	0	0	3	3	1	0	0	0	1	2_notoci_cortisone	0	0	0	0	0	1	0	8gg+	7340	6370	430	14.81395349	NA	NA	1.845	NA	NA	NA	0_noventilazione	2
411	male	41	0	0	0	16	16	0	0	0	0	0	0	0	0	0	0	0	0	0	1	0	0	1	0	1_notoci_nocortisone	0	1	0	1	0	0	0	7gg-	3270	2298.81	430	5.346069767	356	204	479	0.7	329	1_AA	1_venturi	2
412	male	55	0	0	0	40	40	0	0	0	0	1	0	0	0	0	0	0	2	1	1	0	0	0	0	4_toci_cortisone	0	0	0	0	0	0	0	NA	4280	3312.72	1080	3.067333333	NA	361	4.473	11.48	312	1_AA	2_casco	3
413	male	71	0	0	0	30	30	1	1	0	0	0	0	0	0	0	0	1	5	3	1	0	0	1	1	1_notoci_nocortisone	0	1	1	0	1	0	0	8gg+	NA	NA	NA	NA	NA	NA	NA	NA	366	NA	0_noventilazione	2
414	male	56	0	0	0	30	30	0	0	0	0	0	0	0	0	0	0	0	1	0	1	0	0	0	1	3_toci_nocortisone	0	1	1	0	0	1	1	NA	2000	1050	640	1.640625	1796	230	4.473	12.15	352	3_CPAP	2_casco	3
415	male	72	0	0	0	52	52	1	0	0	0	0	0	0	0	0	0	1	3	2	1	0	0	0	1	1_notoci_nocortisone	0	0	1	0	1	0	0	8gg+	7530	6110	820	7.451219512	617	237	524	3.82	452	NA	0_noventilazione	2
416	male	71	0	0	0	40	40	1	1	0	0	0	0	0	0	0	0	0	4	2	0	0	0	1	1	4_toci_cortisone	0	0	0	0	0	0	0	NA	5820	5230	300	17.43333333	2467	373	1.724	29	347	3_CPAP	2_casco	3
417	male	75	0	0	0	14	14	1	0	1	0	0	0	0	0	0	0	0	4	2	1	0	1	1	1	1_notoci_nocortisone	0	1	1	0	1	1	0	8gg+	11050	9930	640	15.515625	90	165	4.382	8.65	433	NA	0_noventilazione	2
418	female	66	0	0	0	7	7	1	0	0	0	0	0	0	0	0	0	0	2	1	1	0	0	0	0	1_notoci_nocortisone	0	1	0	0	0	0	0	7gg-	12850	12030	550	21.87272727	344	259	2.485	7.72	386	NA	0_noventilazione	2
419	female	74	0	0	0	56	56	0	0	1	0	0	0	0	0	0	0	0	6	1	1	0	0	0	1	2_notoci_cortisone	0	0	0	0	0	0	0	NA	4220	2950	700	4.214285714	1236	308	784	10.43	493	NA	1_venturi	3
420	male	95	0	0	0	95	95	1	0	0	0	0	0	0	0	0	0	0	5	1	1	0	0	0	1	1_notoci_nocortisone	0	0	0	0	0	0	0	NA	5700	4150	900	4.611111111	374	181	1.139	22	452	NA	0_noventilazione	1
421	male	75	1	1	1	9	25	1	0	0	0	0	0	0	0	0	0	0	4	1	0	0	0	1	0	3_toci_nocortisone	0	1	0	0	NA	0	0	7gg-	5050	3510	1170	3	NA	286	4.473	7.7	NA	NA	0_noventilazione	3
422	female	39	0	0	0	10	10	0	0	0	0	0	0	0	0	0	0	0	0	0	1	0	0	1	0	1_notoci_nocortisone	0	1	1	0	0	0	0	7gg-	4780	2430	1700	1.429411765	274	139	NA	2.59	548	NA	0_noventilazione	2
423	female	56	0	0	0	17	17	0	0	0	0	0	0	0	0	0	0	0	1	0	1	0	0	1	1	3_toci_nocortisone	0	1	0	0	1	0	0	8gg+	3500	2230	960	2.322916667	232	249	399	4.7	376	2_VM	1_venturi	2
424	female	64	0	0	0	19	19	1	0	0	0	0	0	0	0	0	0	0	2	1	0	0	0	1	0	3_toci_nocortisone	0	1	1	0	0	1	0	8gg+	4100	2390	1200	1.991666667	525	241	755	5.93	386	NA	0_noventilazione	2
425	male	67	1	0	1	15	63	1	0	0	0	0	0	0	0	0	0	0	2	1	1	0	0	1	0	4_toci_cortisone	0	1	0	0	1	0	0	8gg+	11400	9963	421	23.66508314	1825	191	4.211	8.71	300	3_CPAP	2_casco	3
426	male	64	0	0	0	28	28	0	0	0	0	0	0	0	0	0	0	0	2	0	1	0	1	1	1	4_toci_cortisone	0	1	1	0	0	1	0	8gg+	6500	5360	800	6.7	1570	330	2.505	8.1	196	1_AA	1_venturi	2
427	female	60	0	0	0	21	21	1	0	0	0	0	0	0	0	0	0	0	2	1	0	0	1	1	0	1_notoci_nocortisone	0	1	1	0	1	0	0	7gg-	3180	1400	1490	0.939597315	923	249	1.469	0.29	324	NA	0_noventilazione	2
428	male	57	0	0	0	11	11	1	0	0	0	0	0	1	0	0	0	0	2	2	1	0	0	1	0	1_notoci_nocortisone	0	1	0	0	0	1	0	7gg-	2670	1540	870	1.770114943	160	156	0.22	NA	361	1_AA	1_venturi	2
429	female	65	0	NA	1	9	9	0	0	1	0	0	0	0	0	0	0	0	4	1	1	0	0	1	1	2_notoci_cortisone	0	1	0	0	0	0	0	7gg-	1700	960	660	1.454545455	3047	293	329	22.19	183	NA	0_noventilazione	3
430	male	67	0	0	0	25	25	1	1	0	0	0	0	0	0	0	0	0	3	2	1	0	0	1	1	3_toci_nocortisone	0	1	0	0	0	0	0	7gg-	14410	11380	1860	6.11827957	970	139	828	0.2	372	1_AA	2_casco	2
431	male	32	0	3	0	12	12	1	1	1	1	1	0	0	0	0	0	0	0	5	1	0	0	0	1	2_notoci_cortisone	0	1	0	0	0	0	0	8gg+	9980	7140	1820	3.923076923	NA	529	524	1.12	357	1_AA	0_noventilazione	1
